1 **Direct morpho-chemical characterization of elusive plant residues from Aurignacian Pontic Steppe**  
2 **ground stones**

3

4 G. Birarda<sup>1\*</sup>, C. Cagnato<sup>2</sup>, I. Pantyukhina<sup>3</sup>, C. Stani<sup>1</sup>, N. Cefarin<sup>1</sup>, G. Sorrentino<sup>4,5</sup>, E. Badetti<sup>6</sup>, A. Marcomini<sup>6</sup>,  
5 C. Lubritto<sup>7</sup>, G. Khlopachev<sup>8</sup>, S. Covalenco<sup>9</sup>, T. Obada<sup>10</sup>, N. Skakun<sup>11</sup>, L. Vaccari<sup>1</sup>, L. Longo<sup>6,7,12\*</sup>

6

7 **Affiliations**

8 <sup>1</sup>Elettra-Sincrotrone Trieste, S.S. 14 - km 163,5 in AREA Science Park, 34149 Basovizza, Trieste ITALY;

9 <sup>2</sup>Université Paris 1 - Panthéon-Sorbonne, UMR 8096 Archéologie des Amériques, France;

10 <sup>3</sup>Institute of History, Archaeology and Ethnology of the Peoples of the Far-East, Far-Eastern Branch of the  
11 RAS;

12 <sup>4</sup>Dipartimento di Fisica, Università di Torino, Italy;

13 <sup>5</sup>STARC-The Cyprus Institute, Nicosia, Cyprus;

14 <sup>6</sup>DAIS Department of Environmental Sciences, Informatics and Statistics, Università Ca' Foscari Venezia,  
15 Italy;

16 <sup>7</sup>DiSTABIF Università degli Studi della Campania "Luigi Vanvitelli", Caserta, Italy;

17 <sup>8</sup>Peter the Great Museum of Anthropology and Ethnography, St. Petersburg, Russia;

18 <sup>9</sup>Institute of Cultural Heritage, Academy of Sciences of Moldova, Moldova;

19 <sup>10</sup>Institute of Zoology, National Museum of Ethnography and Natural History of Moldova, Moldova;

20 <sup>11</sup>Institute for the History of Material Culture, IHMC-RAS St. Petersburg, Russia;

21 <sup>12</sup>ADM School, Nanyang Technological University, Singapore

22

23 \*[giovanni.birarda@elettra.eu](mailto:giovanni.birarda@elettra.eu)

24 \*[laura.longo@unive.it](mailto:laura.longo@unive.it)

25

26 **Abstract**

27 Direct evidence for the intentional processing of starch-rich plants during the Paleolithic is scant, and that  
28 evidence is often compromised by concerns over preservation and contamination. Our integrated,  
29 multimodal approach couples wear-trace analysis with chemical imaging methods to identify the presence  
30 of genuine ancient starch candidates (ASC) on ground stones used in the Pontic Steppe starting around  
31 40,000 years ago. Optical and electron microscopy coupled with infrared spectromicroscopy and imaging  
32 provide morphological and chemical profiles for ASCs, that partially match the vibrational polysaccharide  
33 features of modern reference starches, highlighting diagenetic differences ranging from partial oxidation  
34 to mineralization. The results suggest the intentional processing of roots and tubers by means of  
35 mechanical tenderization and shed light on the role of dietary carbohydrates during Homo sapiens' (HS)

36 colonization of Eurasia, demonstrating a long acquaintance with predictable calorific foods, crucial to  
37 maintain homeostasis during the harsh conditions of the Late MIS 3 (40-25 ky).

## 38 **Introduction**

39 Starch is how plants store energy, and a highly energetic and nutritious food for humans. The consumption  
40 of starch-rich storage organs has been documented since the Middle Pleistocene through the extraction of  
41 starch grains from dental calculus, coprolites, and gut contents, which can be considered as direct evidence  
42 of their role in the diet<sup>1-4</sup>. On the other hand, charred roots and tubers recognized at early modern human  
43 sites in South Africa and in northwestern Australia<sup>5-7</sup>, and starch grains retrieved in sediments from  
44 Klissoura cave in Greece<sup>8</sup> represent indirect proof of starchy plant foraging. The Epipalaeolithic site of  
45 Ohalo II on the Galilee lake yielded a unique record of thousands of charred protoweeds and other plants  
46 remains as well as ground stones used to process starchy plants<sup>9,10</sup>.

47 In order to enhance the nutritional properties of starchy plants they must be physically processed by  
48 grinding and pounding, and eventually thermally treated to release their nutritional bioavailability to,  
49 finally, generate energy. Ground stones are direct evidence for human-induced mechanical tenderization  
50 of starchy organs. Indeed, starch grains were recognized on a handful of flint flakes from Layer Fa of Payre  
51 (Rhône Valley, France, beginning of MIS 3) and on one trapezoid flint tool from the Early Upper Palaeolithic  
52 Layer C of Buran Kaya III (Crimea)<sup>11,12</sup>. More consistent evidence of intentional starch processing emerged  
53 during the Gravettian, when grinding stones and pestles from the Italian peninsula and central Europe sites  
54 clearly were used to mechanically tenderize underground storage organs (USOs) to obtain a coarsely-  
55 ground flour<sup>13,14</sup>. Charred plant remains used as food are also reported for late Mesolithic sites from  
56 northern Europe (Ertebolle, a coastal settlement in southern Scandinavia<sup>15</sup> and Lubuskie Lakeland in  
57 Poland<sup>16</sup>).

58 However, little is known about the intentional processing of starchy plants during the earliest colonization  
59 by HS of a totally new environment - the northern Eurasian continent - under the very challenging climatic  
60 downturn due to the “volcanic winters” between ca 50 to 38 ka<sup>17,18</sup>. For the present study, we selected  
61 two southern Pontic steppe sites - Surein I (a rockshelter in Crimea) and Brinzeni I (a cave in Moldova) -  
62 driven by the following considerations: their chrono-cultural attribution to the Aurignacian, listed among  
63 the oldest evidence of HS occupation in the area perhaps as a result of this area being a *refugium*, and the  
64 richness in ground stones and the associated presence of human teeth attributed to HS<sup>19,20</sup>. Brinzeni I  
65 counts more than 100 among flat slabs and pebbles putatively interpreted as ground stones retrieved in  
66 Layer 3 with related excavation details (mapping, provenience), however we focused our attention on a  
67 selection of 36 percussive tools and here we present the in-deep analysis of 8 among grinding stones and  
68 pestles. The large slab from Surein I was associated with a structure in square 9B/4-5 from Layer 3,  
69 photographed and mapped during the Bonch-Osmolovsky 1926-29 excavation<sup>21</sup> and philologically  
70 displayed at MAE RAS (St. Petersburg). The ground stones under inspection are part of a broad and  
71 innovative research design devoted to EUP percussive tools, possibly used to process dietary  
72 carbohydrates, described by the authors<sup>13,14,22-25</sup>.

73 The ground stones, excavated at two Aurignacian sites in the Pontic Forest-Steppe were examined from  
74 the functional and use-related biogenic residues perspective by coupling wear-traces and associated starch  
75 grains analyses, anticipated by a thorough cleaning of the used surfaces with a multi peeling process, to  
76 avoid putative contaminants (see Methods section). The research design relies in the observations of the  
77 ground stones from the macro-scale (3D scans and photogrammetry), to optical and digital microscopy,  
78 down to the nano-scale by means of scanning electron microscopy (SEM)<sup>23,24</sup>, and integrates the physical-  
79 chemical characterization of the associated biogenic residues. Starch granules recovered from these  
80 ground stones were investigated by: (i) light (Optical) and (ii) scanning electron microscopies, as well as by

81 (iii) FTIR spectromicroscopy and imaging with both conventional infrared source and (iv) infrared  
82 synchrotron radiation (IRSIR), for providing high resolution chemical profiles of a single starch grain. This is  
83 the very first time that these aforementioned techniques are applied to study Palaeolithic starches.

84 Our results demonstrate the synergistic co-occurrence of the intentional processing of starchy plants with  
85 the earliest settling in western Eurasia by modern humans. The interdisciplinary methodology applied to  
86 the observed ASCs provides experimental evidences for interpreting the Use-Related Biogenic Residues (U-  
87 RBRs) from Brinzeni I and Surein I as indeed composed of ancient starch<sup>26,27</sup> and attribute their  
88 consumption to modern human dwellers approximately 40.000 years ago. Our various lines of data that  
89 include the co-presence of U-RBRs (starch, phytoliths, fibres, raphides), on Aurignacian ground stones is  
90 bolstered by FTIR imaging and multivariate spectral analysis. Our multidimensional contribution  
91 establishes an investigative procedure that combines morphological and chemical analyses, recognizes and  
92 authenticates ancient use-related starch granules, and sheds light on the origins of starchy food processing  
93 in south-eastern Europe during the Aurignacian.

#### 94 *Archaeological context of the research*

95 The Pontic steppe covers the western part of an immense space (the Eurasia Steppe Belt) which crossed  
96 east-west Eurasia, in a mosaic of river valleys from the Dnepr to the Volga and to the Anui, and high  
97 plateaus from the Carpathians to the Urals to the Altai Mountains. Its southern rim covers the  
98 Mediterranean coastal areas of the Euxinos Pontos, as it was commonly known in antiquity, overlooking  
99 the Black Sea and the Caspian Sea and functioning as an open nexus between the northern and southern  
100 boreal territories. This biome is a rich steppe-like grassland dominated by shrubs with spots of forest-  
101 steppe. Regarding the carrying capacity of the territory entered by HS around 40,000 years ago<sup>28</sup>, the biotic  
102 diversity is manifested across the agencies that populated the Pontic Steppe. Different taxa of grazers and  
103 browsers (mega and large herbivores, mammoth, woolly rhinoceros, bison, horse, wild ass, saiga, deer  
104 including giant deer, all source of fats and proteins for the carnivores) were traditional suppliers of fats and  
105 proteins. This wide faunal spectrum is indicative of a varied geomorphology that included river valleys and  
106 steep slopes where the caves opened up, and in turn reflects the plants on which they fed. It is our point  
107 that small mobile groups of Late Pleistocene hunter-gatherers strategically foraged on a broad spectrum  
108 of resources that included starchy plants. The European south-eastern territories, such as Moldova and  
109 Crimea, were peripheral to the permafrost and variations in sea levels allowed for east-west migrations  
110 towards patchy forested landscapes<sup>29</sup>. In these terms, southeastern Europe would appear as a *refugium*  
111 for both humans and animals, as evidenced by the richness of late MIS 3 (40-25 ky calBP) settlements  
112 occupied during the latest phases of the Middle Palaeolithic (MP, Micoquian) and the Early Upper  
113 Palaeolithic (EUP, Aurignacian,<sup>30,31</sup>. Both the Prut River territory and southern Crimean outcrops were rich  
114 in water sources, caves and rock shelters, raw material to be transformed into tools, and in both animal  
115 and vegetal foods. Here we report on percussive stone tools used to mechanically process starchy plants.  
116 Our hypothesis is that small mobile groups of Late Pleistocene hunter-gatherers strategically foraged on a  
117 broad spectrum of resources that included starchy plants.

118 The nine ground stones investigated in this study were retrieved at Brinzeni I, a cave on the Prut river basin  
119 (Moldova) and at Surein I, a rock shelter on the southern slopes of Crimea<sup>23,24</sup>. As shown in Figure 1 A-B-  
120 C, the sites are located within a crucial territory that set the scene for the early occurrence of HS in the  
121 *refugia* areas of the northern rim of the Mediterranean Sea, who most probably crossed paths and mated  
122 with local late Neandertals as supported by the remains at Oase cave (Romania) and Bacho Kiro (Bulgaria)  
123<sup>28,32</sup>. In spite of cross-breeding, paleogenomics currently supports a marked difference in terms of starch  
124 food bio accessibility among the two hominins, with a clear positive selection of gene clusters advocating  
125 for an increased efficient metabolism of dietary carbohydrates in HS<sup>33,34</sup>. Therefore, south-eastern

126 Europe and the Crimean peninsula became one of the key regions to study the dietary strategies during  
 127 the coexistence of Neandertals and modern humans<sup>35,36</sup>.

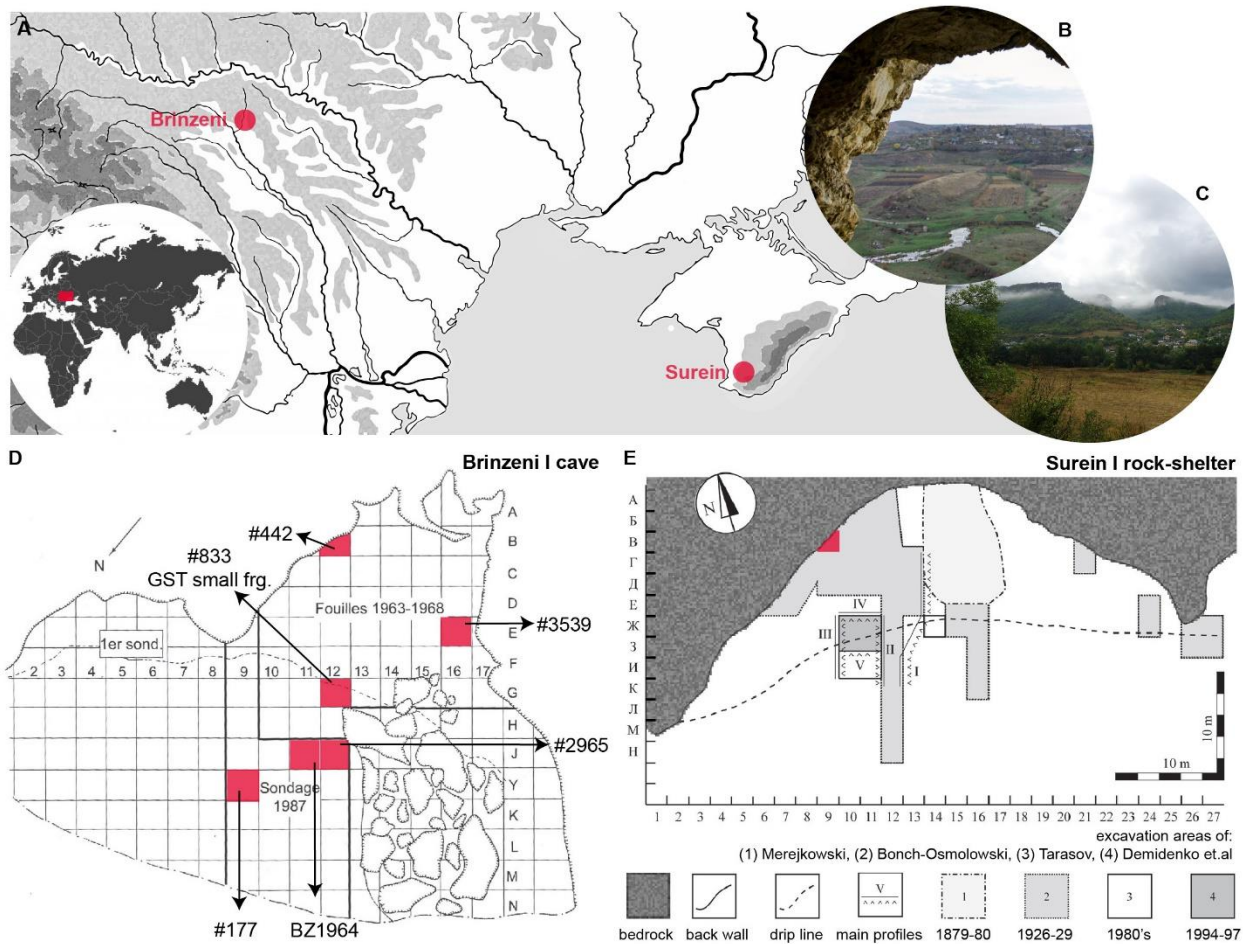

128

129

130 **Fig. 1. Geographic localization of the selected sites.** (A) Pontic Steppe where the sites are located. (B) view from the inside of  
 131 Brinzeni I cave overlooking the Rakozev River valley, a tributary creek of the Prut river; (C) View of the Bel'bek River gorge on which  
 132 the Surein cave opens; (D) Brinzeni I site planimetry where the investigated ground stones are mapped (modified from Allsworth-  
 133 Jones et al. 2018, but maintained the Cyrillic alphabet). Red squares yielded the investigated ground stones: #442 in square 12 B,  
 134 #no number GST small fragment in square 12 Г, #833 in square 12 Г, #2965 in square 12 Ж (these four fragments refit into a  
 135 grinding stone and a complete pestle); #No number BZ1964 in square 11 Ж, #177 in square 9 И; #6707 (no square provenience) is  
 136 a large silty sandstone, #3539 in square 16 E, is a small limestone slab. (E) Surein I planimetry (Bonch-Osmolovsky excavation 1926-  
 137 29, modified from Vekilova, 1957), the limestone slab was retrieved in square 9 B, layer 3.

## 138 Results

### 139 *Ground stones analysis*

140 The grinding stone from Surein I is a large oval slab made of biogenic limestone retrieved in the lowermost  
141 layer 3 square 9 B (Figure 1E), and has an active surface with wear-traces and associated starch grains<sup>23</sup>.  
142 From the large assemblage of Brinzeni I, five grinding stones and three pestles have been analysed (Figure  
143 1 D). Of these, one grinding stone (#442 square 12 B #no number square 12 Г,) and one pestle (#833 square  
144 12 Г, #2965 square 12 Ж) were broken and the refitting was made during this study. The remaining ground  
145 stones are mostly made out of silty sandstone with small size quartz grains (#177 square 9 И; #no number  
146 US 5 square 11 Ж); #6707 (Layer 3, but exact square of provenience unknown) is a large silty sandstone  
147 and #3539 (square 16 E) is a small limestone slab<sup>24</sup>. Differently from Holocene ground stones, the  
148 percussive tools used during the EUP are unshaped pebbles, although a certain standardization is evident  
149 in the selection of size, shape, and raw materials. Wear-traces were recognized on the active areas where  
150 the contact with the working materials was more prolonged or intense, affecting the salient parts of the  
151 uneven surfaces, in the form of spotted polish, alignment of striations, and isolated striae (Figure 2).  
152 Functional analysis was carried out coupling optical and digital microscopy<sup>22</sup>. We established a specific  
153 procedure to extract use-related starch grains from these areas with the purpose of coupling physical-  
154 chemical characterization of starch grains, previously un-attempted (see Methods below,<sup>23,37</sup>).

155 The wear-traces analysis of the mechanical processing of starchy plants by means of ground stones was  
156 first carried out directly on the stones in museum collections, and then by using imprints to reproduce the  
157 stones' surface texture at the nanometric scale further continued off-site, in laboratory settings (see below:  
158 Methods). This procedure, which included 3D scans, Optical, Digital (DM) and SEM microscopy aimed at  
159 resolving the function(s) of the percussive tools under scrutiny and disclosed details and served as a  
160 complementary source of surface analysis for both artefacts and starches. The observation of the molds  
161 using DM and SEM revealed the contextual recognition of plant residues and specifically starch grains still  
162 adhering to the used areas and can be considered a step-change methodological refinement in U-RBR  
163 analysis.

164 Functional analysis detects the presence of several wear-traces (detailed elsewhere,<sup>23,24</sup>) which we briefly  
165 recall here and present in Figure 2. The raw materials of the two assemblages are different: a micritic  
166 sandstone rich in micrometric quartz crystals characterizes the grinding stones and the pestles (hand-held  
167 active tools) from Brinzeni I cave (Moldova) while the Surein I (Crimea) tool is a large steady biogenic  
168 limestone grinding stone. The two raw materials influence the degree of development of wear-traces and  
169 how they are featured: weak glossy spots and spotted polish with varying degrees of brightness, which,  
170 under the DM appear matte and darkish grey as the result of a flattening of the surface's uneven micro  
171 relief (Figure 2 E, L-M, O); clearly aligned parallel linear traces that cross the image (Figure 2 B-D; I, J, N).  
172 Other traces include more diffused spotty polish associated with striations that affect the salient parts of  
173 the micro topography (Figure 2 G-H; L-M) and the presence of entrapped fibers on the striated areas on  
174 the most prominent reliefs (Figure 2 O).



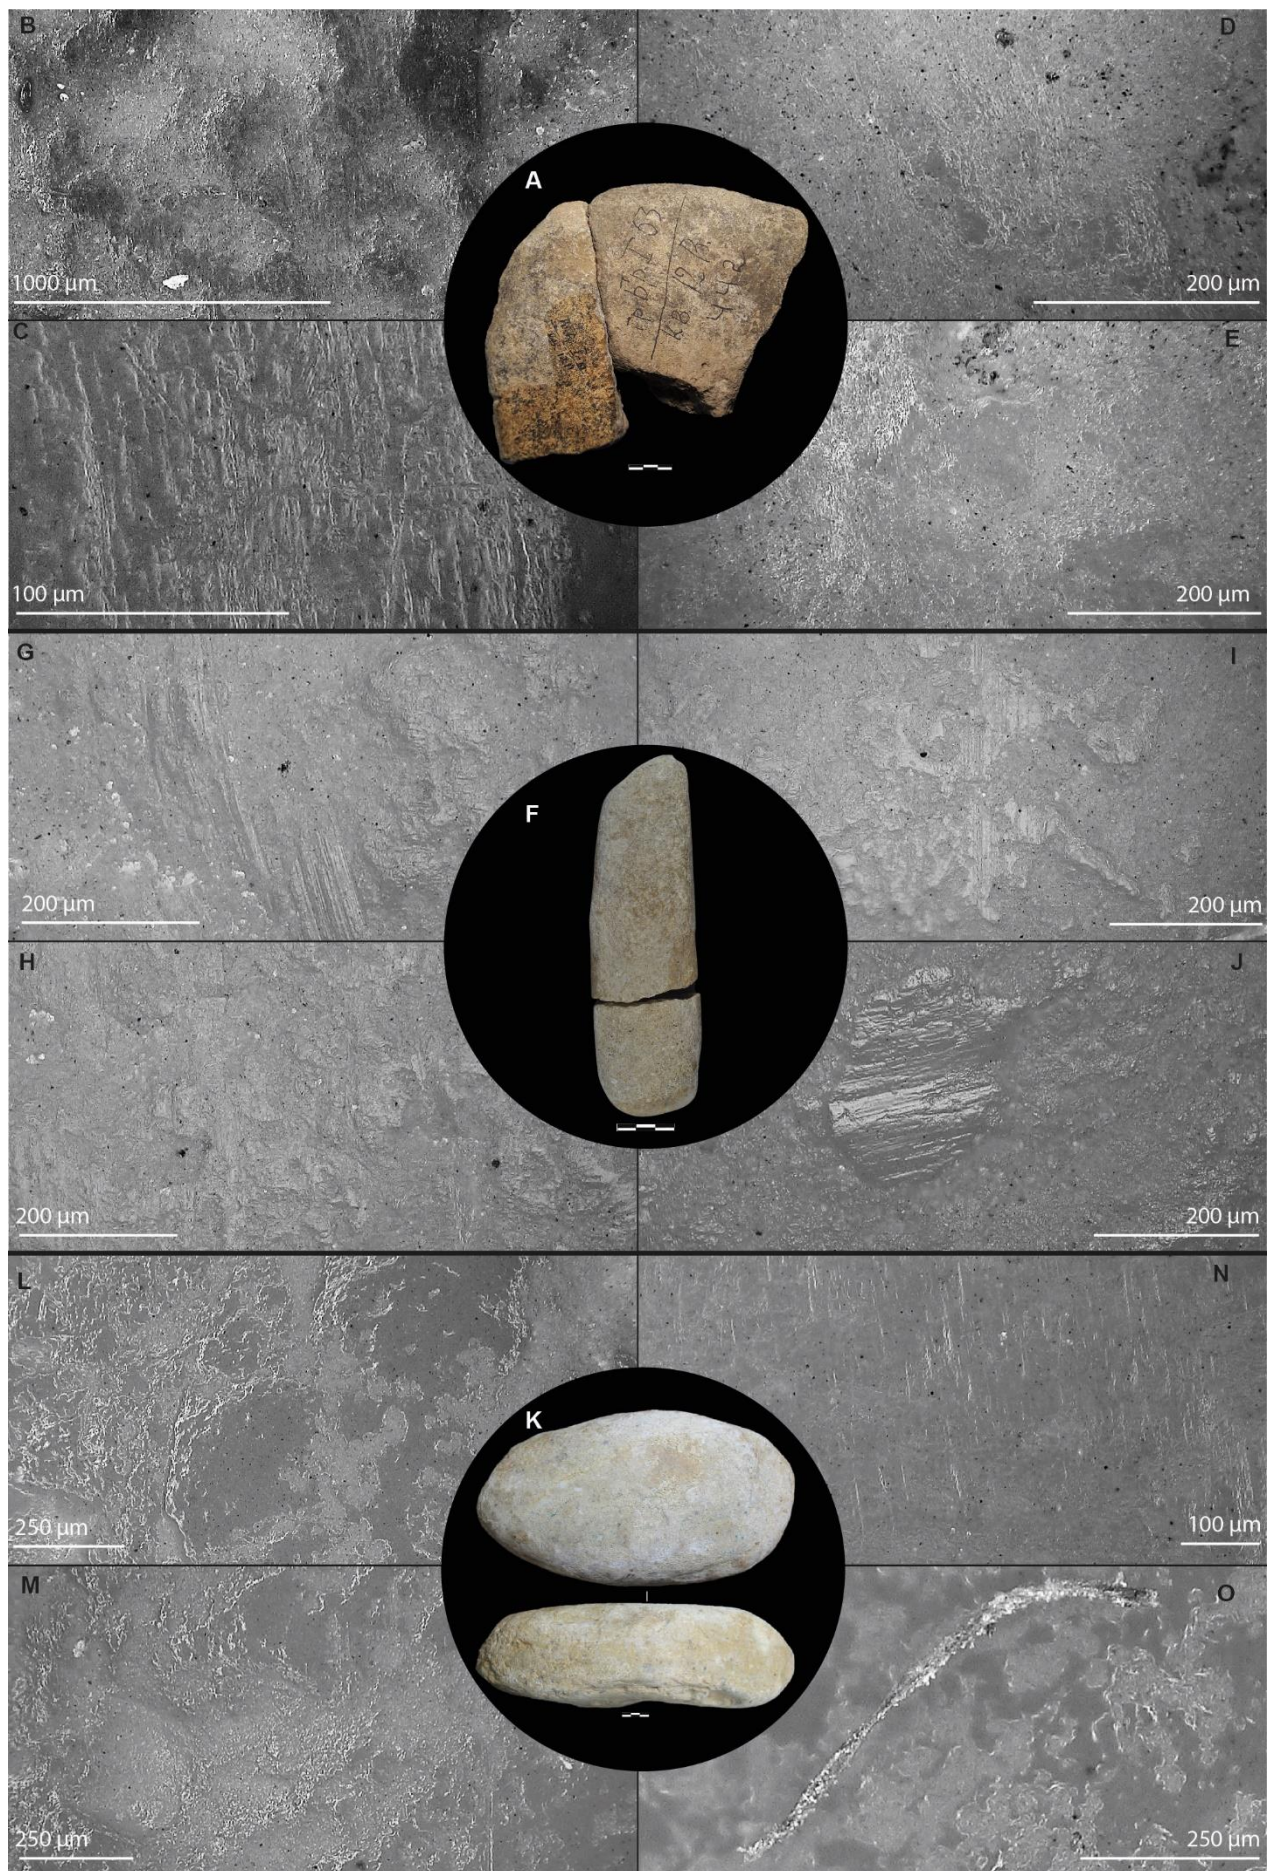

176 **Fig. 2. The Ground stones and the wear traces analysis. (A-J)** Brinzeni I: **(A)** wear-traces on the refitted grinding stone and the  
177 pestle, **(B-C)** #No Number, left fragment, **(D-E)** #442, right fragment, **(F)** Broken pestle, **(G-H)** #833, upper fragment, **(I-J)** #2965,  
178 lower fragment. In panels **(B-C-D-E-G-H-I-J)** Aligned polished areas and striations. **(K-O)** Surein I grinding stone, Face A (several  
179 used areas) and lateral view; **(L-N)** spotted polish, on which linear traces and alignment are visible fashioned as shallow lines of  
180 varying lengths. **(O)** Polished areas associated with a fibre. Digital microscope Hirox KH-8700 (lens MXG-2500REZ).

181

182 The Brinzeni I pestles showed more intense traces on the rounded apex of the movable tool which was  
183 used for pounding and threshing activities usually in bi-directional coupled kinematics. The large broken  
184 grinding stone from Brinzeni I shows the highest development of wear-traces in the sections where the  
185 two fragments refit, clearly demonstrating this is the part undergoing maximum mechanical stress. For the  
186 Surein I grinding stones, the most-defined use-wear traces are concentrated in the central part and, to a  
187 lesser extent, in peripheral areas.

188

### 189 *Use-related starch grains*

190 We performed the high-resolution physical-chemical characterization of ancient starch grains after their  
191 extraction from actively used areas of the ground stones according to the authors' standard procedure  
192 (Methods below, <sup>23,24</sup>). In detail the analysis focused on the extracted material that present at least two of  
193 the following characteristics: i-starch-like morphology as revealed by SEM and/or optical analyses, ii-  
194 Maltese cross when inspected with polarized light, iii-main FTIR spectral features of polysaccharides <sup>38</sup>.  
195 These extracted particles will be referred to as "ancient starch candidates", ASC, to distinguish them from  
196 Modern Starch Reference (MSR). A finer classification of both ASC and MSR is reported hereafter:

- 197 • **ASC-1:** Starch observed directly on the molds. Not suitable for FTIR analyses.
- 198 • **ASC-2:** Encrustations adhering to the ground stones removed by sonication of the stone and  
199 crushed using a laboratory agate mortar and pestle until obtaining a fine powder that was then  
200 suspended in ultrapure water and deposited on a ZnSe window for FTIR measurements.
- 201 • **ASC-3:** Starch isolated from the sonication of molds in ultrapure water. The particle suspension  
202 was deposited on a silicon or ZnSe window for FTIR measurements.
- 203 • **ASC-4:** Starch isolated according to published protocols (Pearsall et al. 2004).
- 204 • **MSR-1:** Starch grains extracted from grinding and pounding reproducing ancient technologies.
- 205 • **MSR-2:** Laboratory processed starch grains obtained by sequential water and ethanol extractions.

206 Optical microscopy (Figure 3) and SEM data (Figure 4) will be presented in order to provide insights on the  
207 morphology and fine structure of the recovered ASCs, and of other plant remains observed in the samples.  
208 Then, FTIR data on dried powder deposits (ASC-2 and ACS-3) and isolated ASC-4 will be commented in  
209 order to delineate the chemical profile of the particles of interest. Then the ASCs FTIR spectra will be  
210 compared with those of MSR-1 and MSR-2, and confronted using a chemometric model.

211

### 212 *Use-Related Biogenic residues: Optical and SEM characterization*

213 Starches are synthesized in amyloplasts and deposited in rings composed of amylose and amylopectin that  
214 grow as grains <sup>39,40</sup>. Grains are then stored in various organs of the plant, both in underground storage  
215 organs (USO) such as roots, rhizomes, and tubers, and above ground organs (ASO) that include fruits and  
216 seeds.



217 Through the optical microscopy inspection, several use-related plant remains, namely starch grains (Figure  
218 3 and Figure 4) and fiber (Figure S1), were identified on both the ground stones from Brinzeni I and Surein  
219 I, according to standardized procedures as reported in<sup>24</sup>. Then, use-related residues were observed directly  
220 on the molds by means of Digital (Figure 2 O) and SEM microscopy (ASC-1, Fig. 4 B-C, Figure S1 E-F).  
221 Afterwards, some particles were separated from the stones by soaking the targeted used areas of the tool  
222 in an ultrasonic tank cleaner at room temperature (ASC-2). Intriguingly enough, the SEM preliminary  
223 inspection revealed that U-RBR namely starch grains and fibers were still adhering to the imprints. Once U-  
224 RBR were observed still adhering to the molds, a second approach used the molds as a source of plant  
225 residues and even the molds (or selected parts of them) were sonicated to extract starch grains (ASC-3).  
226 The procedure to extract ASC-4 has already been described in detail elsewhere<sup>23,37</sup>.

227 Overall, from the samples whereby the starch grains were isolated using standardized laboratory protocols,  
228 e.g.<sup>41</sup>, and using optical microscopy, we counted a total of 66 starch grains on the tools from both Brinzeni  
229 (n=59) and Surein (n=7). The size of the grains is micrometric, averaging less than 50  $\mu\text{m}$  in the case of our  
230 samples. Light microscope resolution, up to 0.2  $\mu\text{m}$ , allows for viewing the morphological features as well  
231 as the characteristic extinction cross (Maltese cross) evident under cross-polarized light. Some examples  
232 of recovered ASC-4 starches are shown in Figure 3. We were unable to determine their taxonomic  
233 identifications, due to the relative poor conservation of a large majority of the starch grains, but also  
234 because of a lack of reference collection for this geographic region and time period<sup>12,42</sup>. However, it was  
235 possible to distinguish different morphologies and to detail diagnostic features namely the hila and  
236 lamellae. Moreover, several starches were clearly broken as the result of mechanical processing, and show  
237 pits and cavities interpreted as the result of biochemical activities (soil enzymes or other biogenic agents  
238 like fungi or bacteria). From Brinzeni I, we found a wide variety of morphologies, which include lenticular  
239 (Figure 3 A-B), polyhedral (Figure 3 E-F), and roundish starch grains (Figure 3 G-H), but this could be related  
240 to the larger number of samples from Brinzeni cave compared to Surein. We also recovered starch grains  
241 of probable USOs (Figure 3 C-D). From Surein, we observed polyhedral grains, which range in size between  
242 15 and 23  $\mu\text{m}$ , as well as more oval forms, which measured between 18 and 19  $\mu\text{m}$  wide (Figure 3 K-L).  
243 Damages were evident on a large majority of the starch grains and include broken or crushed grains (Figure  
244 3 I-J), deformed grains, loss of extinction crosses, as well as circular or uneven depressions affecting the  
245 central parts of the grains where the hilum is located (Figure 3 E-F). These damages suggest different types  
246 of mechanical forces or processing activities, or even taphonomic processes<sup>43-46</sup>.

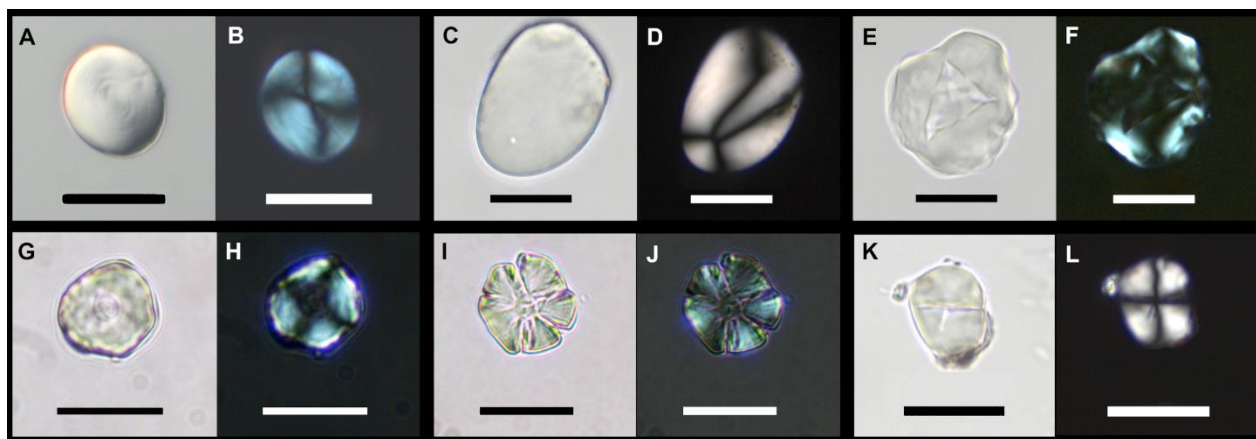

247  
248 **Fig. 3. Optical characterization of the ASCs.** (A-H) Starch grains from Brinzeni I and (K-L) Surein I under Optical Microscope direct  
249 and polarized light. Starches from Brinzeni: (A-B) Sample 5, (C-D) #177, (E-F) #833, (G-H) #3539, (I-J) #6706, and from Surein I (K-  
250 L). Scale bars 20 microns.

251 ASCs were also observed by SEM, revealing finer details regarding the shape, size, and overall surface  
252 details (Figure 4). Moreover, SEM allowed for the smallest sized grains to be spotted (<5  $\mu\text{m}$ ) which is



253 challenging with optical microscopy. The SEM analyses were first carried out directly on the molds from  
254 both sites (ASC-1) and on the resulting dispersion of particles from the sonicated stones and molds,  
255 deposited on Si or ZnSe windows (ASC-2 and ASC-3). A large number of ASC-2 from Brinzeni was identified  
256 (Figure 4 A to L). Although they are often surrounded by an important quantity of sediment, as shown in  
257 panel A, they are clearly recognisable by their polyhedral or rounded shape. Their surfaces are not as  
258 smooth as in the case of the modern starches (see Figure 5 panel Ji). The archaeological starches exhibit  
259 rough surfaces possibly due to different kinds of damages and aging as well. The rounded starch grain  
260 shown in panel B displays some striations; these could be interpreted as the result of mechanical pounding  
261 hinting to an intentional processing of starch-rich storage organs. The starch grain in panel C shows an  
262 eroded and pitted surface. Moreover, the characteristic hilum can be appreciated, even in lateral positions  
263 (Figure 4 C-D). Some grains from Brinzeni showed cracking and exfoliation of the external surface and the  
264 typical internal amylose-amylopectin lamellar structures are exposed (Figure 4E and its magnification,  
265 panel F; panel G and its magnification, panel H). Several grains showed exfoliations and disruptions (Figure  
266 4I and its magnification, panel J and panel K and its magnification, panel L). Grains from Surein I (Figure 4  
267 M to T) are ASC-3 type. They appear to have less soil residues and show a smoother surface if compared  
268 with the Brinzeni ones. They are mainly characterized by an oval or roundish shape and in some cases they  
269 showed a radial fibrillar fracture surface (Figure 4 M and N), typical of crushed starch granules<sup>47</sup>. A peculiar  
270 conical crater has also been observed in the major part of the Surein I grains (Figure 4 O, P and Q, R).

271 SEM images also revealed the presence of numerous U-RBR belonging to plants (Figure 4, panels Q to T  
272 from Surein I and U to X, from Brinzeni). Among them raphides, or needle-shaped calcium oxalate crystals  
273 (panels Q and R), are common in higher and lower vascular plants and algae<sup>48</sup>. Based on the two  
274 symmetrical pointed ends of the crystals, it would appear that these belong to Type I, considered the most  
275 common form of raphides<sup>49</sup>. However, to confirm this we would also have to see them in cross-section  
276 and verify they are indeed four-sided, which we were unable to do. While it is not possible to identify these  
277 raphides to their taxon, their presence further supports our argument that the ground stone tool was used  
278 to process plant matter, arguments put forward by Hardy and colleagues<sup>12</sup> following their research at the  
279 site of Buran Kaya III in Crimea.

280 Residues of amyloplast parenchyma are dispersed in several samples both from Surein I (Figure 4, panel S,  
281 surrounding the starch granule; panel T) and Brinzeni (panel U, light green colored). We also noticed that  
282 the starch granule in panel S, magnified in panel T, showed a different pattern of degradation if compared  
283 with starches from Brinzeni I. If the latter presented damages to the external surface, this starch from  
284 Surein I revealed to be affected by erosion or solubilization of the internal portion whilst keeping the  
285 external surface almost intact, even if crushed and flattened as already observed for the granules from this  
286 site (see details in panel T).

287 We also noted the presence of a fiber on the Brinzeni I grinding stone (small fragment), which seems very  
288 withered and covered in both minerals and a couple of starch grains (Figure 4V, and supplementary  
289 materials). Finally, putative elongated phytoliths (silica bodies) produced within both the intra- and  
290 extracellular structures of plants, were observed, especially in the samples from Surein I and from Brinzeni  
291 I, sample 5 (pestle) (Figure 4, panels W and X).

292

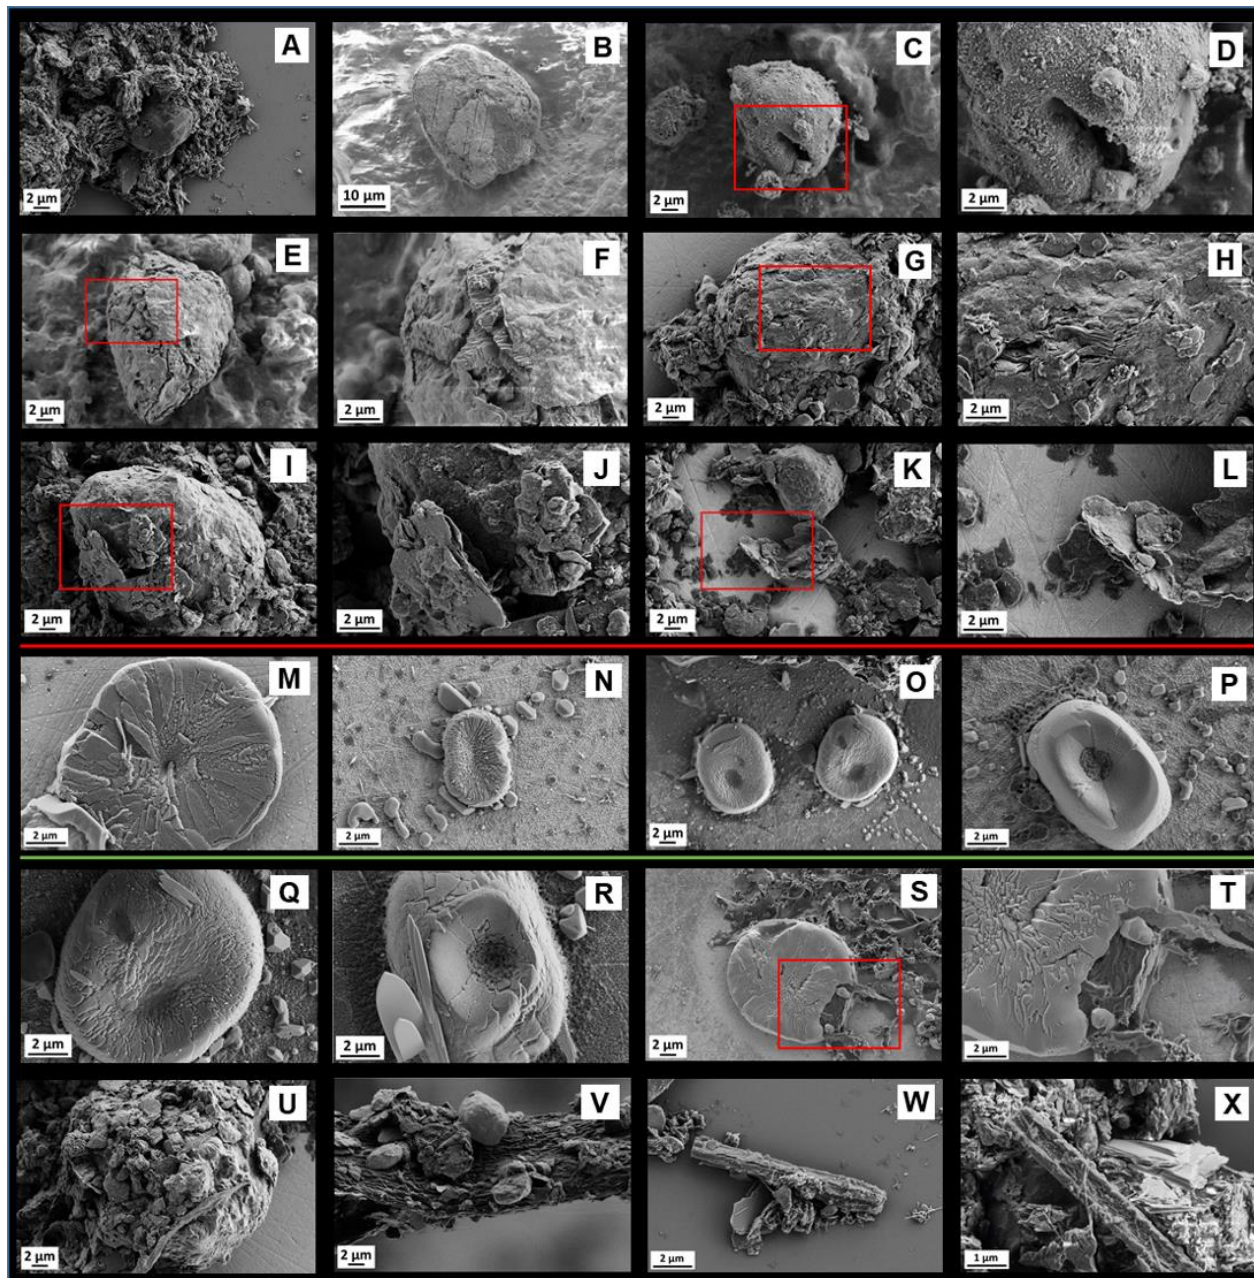

293

294 **Fig. 4. SEM characterization of the ASCs and U-RBRs.** SEM micrographs of starch grains extracted from different ground stones.  
295 (A-L) Brinzeni I, and (M-P) Surein I separated by a red line. The green line separates the panels dedicated to the morphological  
296 characterization of starches and their modifications, from the Use-Related Biogenic Residues (U-RBR) belonging to plants. (Q-R)  
297 Raphides directly associated with starches are evident in samples from Surein I, in (S-T) parenchyma remains are shown, in (U-V)  
298 some fibres, with some starch grains attached (see also S1) and in (W-X) phytoliths.

299 Furthermore, with the level of detail reachable with this imaging technique, it was possible to see the fine  
300 structure of the ASCs down to the individual lamellae that constitute the starches (Figure 4F and H).  
301 Nevertheless, to reach beyond the descriptive approaches up to now employed in the analysis of this kind  
302 of samples, we complemented the morphological analyses with a label free, non-damaging chemical  
303 characterization of the samples by using FTIR microscopy and imaging.

304

305 *FTIR imaging on particles from the ground stones*

306 Several far field IR images were collected and then the data processed and analysed. As can be seen from  
307 optical images in Figure 5A and 5E, showing ASC-2 sample obtained from the Brinzeni pestle BZ#833 and  
308 ASC-3 sample from Surein I, the sonicated powders present a predominance of mineral signals, with few  
309 organic materials mixed with soil particles. Several round, starch-like objects can be observed, although  
310 not all of them have a FTIR spectrum, that is a chemical composition, compatible with a carbohydrate-  
311 based particle<sup>50</sup>.

312 As a matter of fact, aiming to find and characterize any ASCs, chemical images were generated by  
313 integrating the infrared hyperspectral data at specific spectral intervals indicative of carbohydrates: 3500-  
314 3100  $\text{cm}^{-1}$  for the OH stretching, 3000-2800  $\text{cm}^{-1}$  for -CH stretching of methyl and methylene groups, 1200-  
315 900  $\text{cm}^{-1}$  for the C-O, C-C and C-OH stretching of carbohydrate backbone<sup>51</sup>. Conventionally, this latter  
316 spectral range is the most distinctive for carbohydrates, and used for their characterization. Nevertheless,  
317 at the same energies there can be an interference due to the presence of signals from metal-oxides,  
318 silicates, phosphates and sulphates from the soil that, indeed, generate “false” hotspots in the chemical  
319 maps<sup>52</sup>.

320 By observing the chemical images generated integrating the 1100-1150  $\text{cm}^{-1}$  spectral region in Fig. 5D and  
321 H, it is clear how they portray among the all possible ASC hotspots, but also surely the minerals from the  
322 soil. Especially, in the deposition from Brinzeni, the particles are so densely packed together, making it  
323 really difficult to identify the single starches in the C-O-C chemical image (Figure 5D). Nevertheless, by  
324 comparing the same image pixels in the other two chemical maps (B and C), it is possible to identify areas  
325 with common local maxima, pointed by arrows, where also the other peculiar carbohydrate signals are  
326 intense. From these areas, average spectra of ASCs were extracted and some of them are presented in  
327 panel 5I. It has to be highlighted at this stage that, in order to bring out the ASC chemical profile over the  
328 soil contribution, the spectral contribution of the surrounding material has been carefully subtracted, as  
329 described in methods. The spectral profiles of these ASCs present strong absorbance signals in the 1200-  
330 900  $\text{cm}^{-1}$  range, typical of C-O-C, C-O and C-C ring vibrations, medium to strong -OH signals, index of a  
331 different degree of degradation/oxidation, and weak to medium -CH stretching signals, index of a partial  
332 chain scission, with the main peak of the methylene moieties centered between 2920 and 2925  $\text{cm}^{-1}$  for all  
333 samples. It can be noticed that some ASCs spectra, e.g. red and black spectra in Figure 5I, present signals  
334 from calcium carbonate, like the broad intense band at  $\sim 1430 \text{ cm}^{-1}$ , the C=O stretching at 1790  $\text{cm}^{-1}$  and  
335 the overtone at 2520  $\text{cm}^{-1}$ , while some clay-like signals at higher frequencies, with sharp peaks at 3612-  
336 3614  $\text{cm}^{-1}$ , can be seen in the green and violet spectra in Figure 5I. Spectra e and f in panel 5I present also  
337 a shoulder at  $\sim 1322 \text{ cm}^{-1}$ , assignable to calcium oxalate. Even after subtracting the contribution of the  
338 surrounding material, it was not possible to remove these spectral features, thus it is possible to  
339 hypothesize that these signals do not come from a contamination from the soil, but are due to a partial  
340 mineralization of the ASCs due to a slow exchange with the stone of the pestle, as confirmed by ASC-4  
341 analysis (see later/below page when definitive).



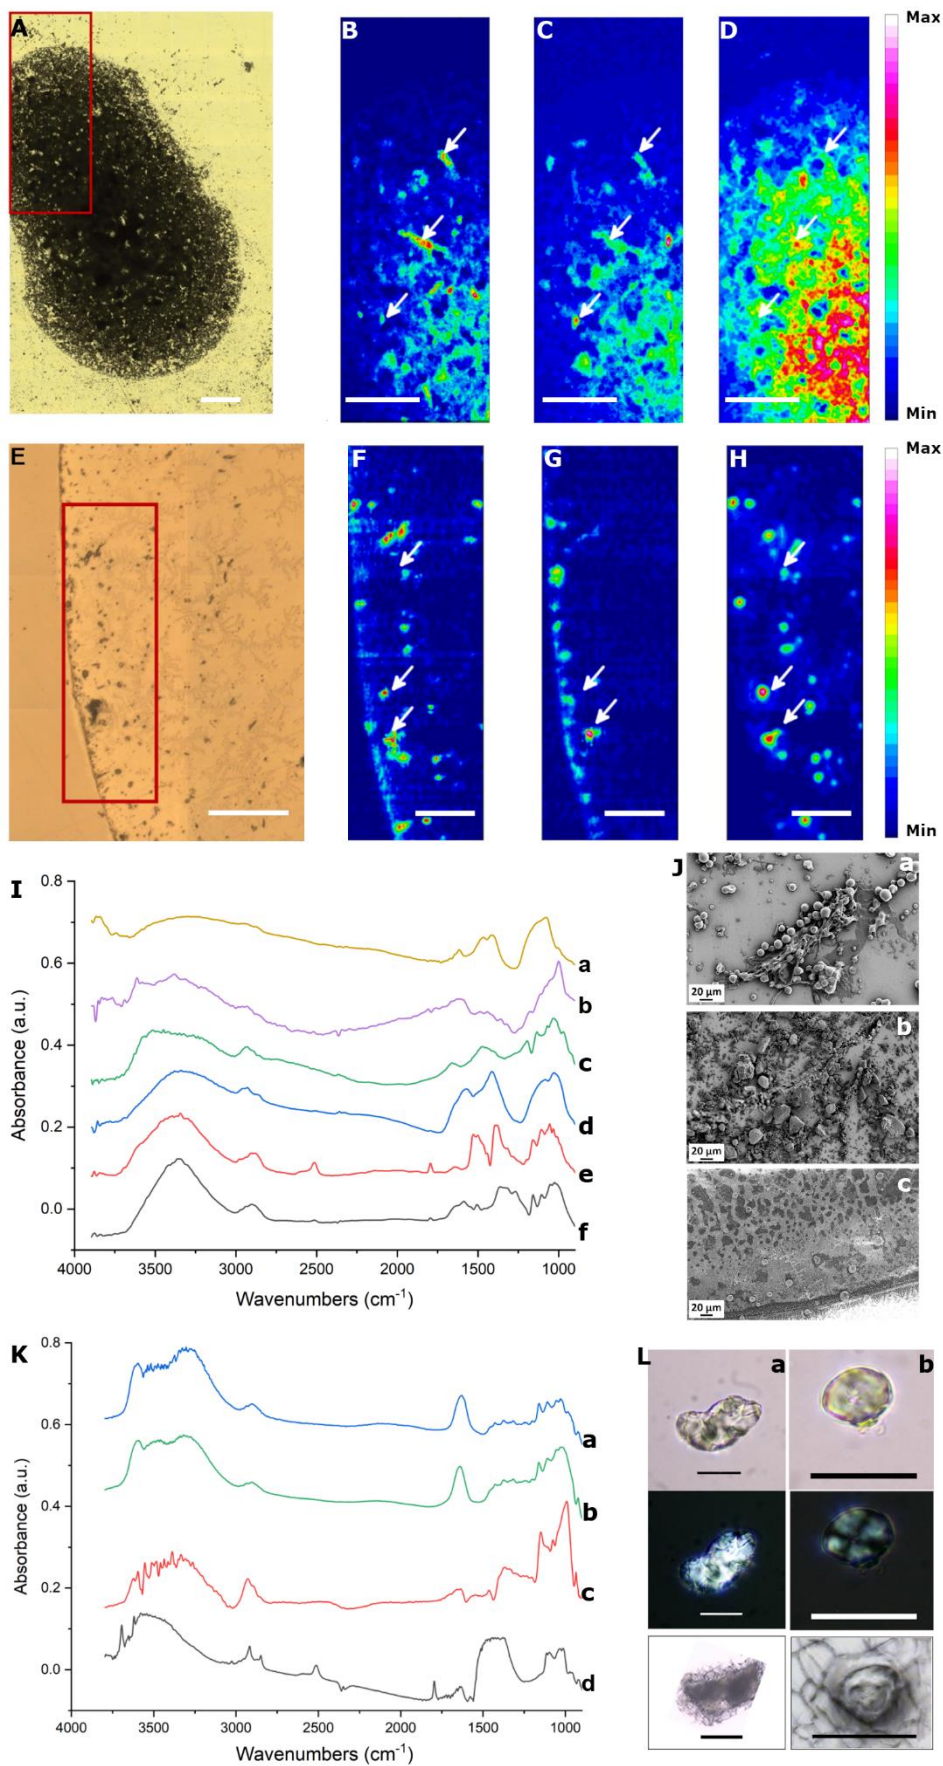

342

343

344

**Fig. 5. FTIR data on the ASCs. (A)** Overview of a deposit of particles obtained from a ground stone from BZ 1964 Layer 3 square 11j (no number, Sample 5), the red rectangle indicates the measured area, the scale bar is 150 microns. **(B-D)**. Heat maps of the

345 inspected area from Brinzeni #833 were generated by the integration of specific infrared bands: **(B)** -OH stretching, **(C)** C-H  
346 stretching, **(D)** C-O-C stretching. The scale bars are 150 microns. **(E)** overview of a drop of the suspension obtained by the sonication  
347 of mold n. 3 from Surein I, the red rectangle identifies the measured zone. The scale bar is 150 microns **(F-H)**. Heat maps generated  
348 from Surein I data as done for the Brinzeni sample. The hot spots (red-purple) represent the pixels where the integral value is  
349 higher, dark blue areas correspond always to 0. the scale bars are 75 microns. **(I)** Six representative spectra of ASC-2 and ASC-3 **a)**  
350 **to e)** from Brinzeni #833 and **f)** from Surein I. **(J)** SEM micrographs of ASCs: **a)** image of modern starches from a fresh *Manihot* root  
351 from Tanzania, **b)** image of starches surrounding a fiber from Brinzeni I, **c)** image of a group of starches from Surein I. **(K)** Spectra  
352 of some of the ASC-4: **a)** and **b)** from BZ#3539, **c)** from BZ#6707 and **d)** from BZ#442. **(L)** From top to bottom, transmitted and  
353 polarized light photographs of the starches **a)** from BZ#2965 and **b)** from BZ#6707 on the glass slide, in the lower panel, the same  
354 starches after being transferred onto the ZnSe window.

355 Summarizing, among all twenty-five ASCs identified among ASC-2 and ASC-3 samples inspecting over fifty  
356 chemical maps, common ASC carbohydrate-distinctive traits were identified but also a quite high variability  
357 in the peak positions of the signals in the 1100-900  $\text{cm}^{-1}$  region as well as in the relative intensities of the  
358 main bands was observed, possibly due either to different degrees of order/crystallinity/aging or to the  
359 different plant species from which the ASCs originated from<sup>51,53</sup>. As an additional note, the small number  
360 of found ASCs should suggest the absence of contamination from modern starches.

361 Moreover, in some samples it was possible to chemically identify other plant materials, such as small  
362 wooden fibers for example, e.g. spectrum f presents also a signal at  $1511\text{cm}^{-1}$  from the aromatic moieties  
363 of lignin and ferulic acid. SEM and FTIR images of a fiber are shown in the supplementary materials. The  
364 fiber looks withered and covered in minerals, nevertheless the FTIR signals are preserved. Analyzing the  
365 SEM micrographs made it also possible to notice a starch particle attached to this fiber. The good  
366 preservation of the fibers retrieved on both sites ground stones strengthens our claim regarding the good  
367 preservation of other plant material in these samples (Figure S1).

368

#### 369 *FTIR on Isolated Starches*

370 In order to confirm the starch nature of ASC identified in ASC-2 and ASC-3 samples, we focused the analysis  
371 on ASC-4. In Figure 5K, the FTIR spectra of four isolated starches (ASC-4), three from Brinzeni I site (#442,  
372 #6707, and #3539) and one from Surein I, are shown. Spectral analysis and comparison with the vibrational  
373 profiles in Figure 5I allow us to confirm the findings and assignments done on the previous dataset on ASC-  
374 2 and ASC-3 samples. All spectra exhibit peculiar carbohydrate features, associated to -OH stretching, -CH  
375 stretching and ring vibrations in the spectral region  $1200-900\text{ cm}^{-1}$ , and relative intensity and positions of  
376 the bands can vary sample from samples, as already highlighted. Furthermore, as observed in other ASC-  
377 2 and ASC-3 (e.g. Figure 5I-e and 5I-f, black and red lines), and the ASC-4 starch from BZ#442 (Figure 5K-d  
378 black line) underwent a partial mineralization process because the signals from  $\text{CaCO}_3$  are also evident.  
379 Since the presence of the extinction cross (Figure 5 L-a) undoubtedly confirms the starch nature of ASC-4  
380 remains and the optical images exclude a severe cross-contamination from soil particulate, it is possible to  
381 conclude that the mineral/carbonate features are peculiar of ancient starches and indicative of the  
382 diagenetic process they underwent.

383 In Figure 5L are shown the optical images of a starch isolated from BZ#2965 (a) and one from BZ# 6707 (b)  
384 along with their cross polarization images obtained on the glass slide and below are presented the images  
385 of the same ASC-4 after being transferred onto the ZnSe optical window.

386

#### 387 *FTIR on modern starches*

388 It has to be highlighted that the spectral variability in the  $1200-900\text{ cm}^{-1}$  spectral region, particularly evident  
389 for the Brizeni samples #442, #6707, and #3539 in Figure 5K, could be also due to a different origin of the

390 isolated starches. Since it is likely that modern plants changed over a period of 40.000 years <sup>1</sup>, the former  
391 hypothesis cannot be verified by a direct comparison of what was retrieved from the pestles and GSTs with  
392 non-existent standards. This is even more true if we also consider the chemical modifications due to the  
393 aging undergone by the ASCs.

394 Nevertheless, some similarities in the ASCs spectra could be observed and used to classify them. To this  
395 aim, we acquired data on modern extracted starches, MSR-1 and MSR-2, and used them to build a model  
396 capable of categorizing the ASCs with respect to their modern counterparts. The database contains 137  
397 spectra of starches belonging to eleven different plant species representing both under (USO) and above  
398 (ASO) storage organs from boreal and tropical environments: rice (*Oryza sativa*), water chestnut (*Trapa*  
399 *natans*), broadleaf cattail (*Typha latifolia*), narrowleaf cattail (*Typha angustifolia*), nutgrass (*Cyperus*  
400 *rotundus*), kudzu (*Pueraria* sp.), horse chestnut (*Aesculus hippocastanum*), rapeseed (*Brassica rapa* var.  
401 *sylvestris*) from boreal biotopes, while sweet potato (*Ipomoea batatas*), manioc (*Manihot esculenta*), and  
402 yam (*Dioscorea* sp.) represent the tropical species.

403 The model uses a principal component analysis (PCA) to identify the spectral features of maximum variance  
404 within the dataset and a kNN (k-nearest neighbors) algorithm to classify the unknown data in the PC space.  
405 A more detailed description and the performance indicators of the method evaluated by using stratified  
406 cross validation are presented in the supplementary materials.

407 In Figure 6A is presented the PC1 and PC4 score-plot of the PCA space used to generate the chemometric  
408 model; these two components have been selected since they grant the best separation among the classes.  
409 In panel 6B are shown the spectral loadings of PC1 and PC4. The loadings represent the ensemble of the  
410 spectral features that account the largest variance for each component. PC1 main peaks are those of  
411 carbohydrates: 1168 cm<sup>-1</sup> from ring “breathing” vibration, 1065 cm<sup>-1</sup> due to in plane bending of C-OH bond  
412 and 1030 cm<sup>-1</sup> assigned to the C-OH stretching <sup>54</sup>. PC4, instead, presents the most intense peaks at 1730  
413 cm<sup>-1</sup> and 1704 cm<sup>-1</sup>, assigned to the C=O stretching from oxidation products and aldehyde group, 1613 cm<sup>-1</sup>  
414 and 1567 cm<sup>-1</sup> from the stretching of the vinyl bonds, and a peak at 1423 cm<sup>-1</sup> from carbonates.

415 In Fig. 6A are also included the tested ASCs (4 ASC-2, 19 ASC-3 and the 13 ASC-4), not used for the model,  
416 in order to make possible the visualization of the relationship of the spectra of the ASCs in respect to those  
417 of the MSRs. It can be seen that most of the ASCs are in a PC1-PC4 positive quadrant, with some of them a  
418 little farer from the references, that are the spectra of the ASCs more affected by the aging and  
419 mineralization processes. Those better preserved are closer to those of the MSRs. This can be better  
420 appreciated in Fig. 5C, where we present a comparison between ASC-3, ASC-4, and MSR representative  
421 spectra. It can be noticed that both ASCs lost most of the sharp peaks in the 1200-900 cm<sup>-1</sup> range, as a  
422 result of the degradation and loss of ordered structures. Another signal of aging is the loss of the intensity  
423 of the OH band, that in most of the ASCs’ spectra is lower than in the MSR, as a consequence of a withering  
424 of the plant material.



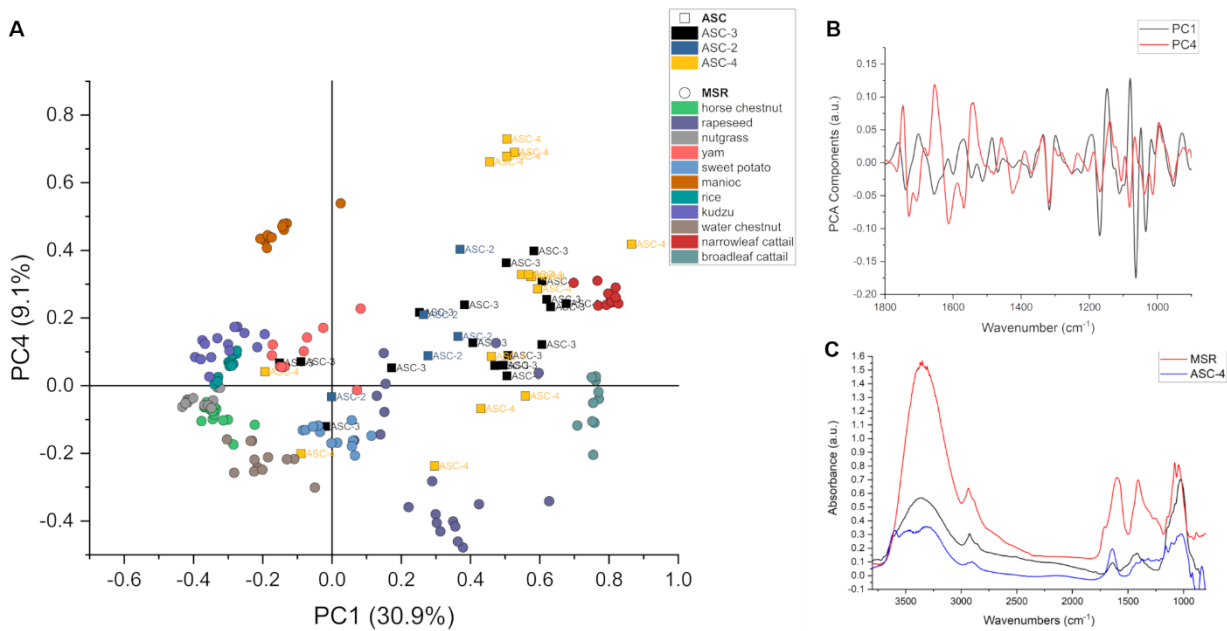

425

426

427

428

429

**Fig. 6. Chemometric model developed for ASCs classification. (A)** Scatterplot of the MSR (spheres) and ASC (squares) in the PC1-PC4 space. **(B)** Spectral components representing PC1, in black, and PC4, in red, in the spectra range 1800-900 cm<sup>-1</sup>. **(C)** Comparison of a spectrum of an ASC-3, in red, ASC-4 in green, and one MSR (*Manihot esculenta*) in blue. The highest clustering is within the USOs (roots, tubers, and rhizomes), compatible with the presence of geophytes in the Pontic Steppe.

430

431

432

433

434

435

By using the built model, we identified 4 ASC-2, 19 ASC-3 and 13 ASC-4, by giving a degree of similarity to the species that these starches could belong to. Results are reported in the table in supplementary materials. From the data in Table T1 it can be seen that the majority of the starches belong to rhizomes and tubers (e.g. USOs), and only one is identified as rice (i.e., outlier in the model). It has to be noted that the partially mineralized starches from BZ#442 were also classified with a percentage of >80% as originating from a rhizome.

436

437

## Discussion

438

439

440

441

442

443

444

445

446

447

448

The role played by plants in the human diet is widely accepted since early times as demonstrated by the outstanding record of macrobotanical remains in the Acheulian site of Gesher-Benot Ya'aqov in Israel<sup>55</sup>. However, direct data of their intentional processing for consumption is scant and mostly circumstantial<sup>5-7</sup>. Late Pleistocene evidence consisting of a few grains of starch was reported from dental calculus<sup>1,56-58</sup> although their interpretation as having a food origin and exposed to thermal treatment was contended<sup>26</sup>. The presence of entrapped granules in the calculus might be connected with alternative sourcing, namely the widespread ethnographic use of stomach chyme, a practice reported by Darwin (1839) during his "The Voyage on the Beagle" while observing gauchos from the Argentinian Pampa<sup>59</sup> and as recently noted for the Eskimos<sup>60</sup>. Therefore, an alternative explanation for the presence of plant remains (starches and phytoliths) in dental calculus may need to be considered: it is not obviously always related to intentional starch processing.

449

450

451

452

453

454

The occurrence of use-related starchy residues on Early Upper Palaeolithic stone tools is poorly investigated and only a few starch grains have been reported on stone tools from Crimea<sup>12</sup>. The wear-traces and the starch grains retrieved on ground stones dating back to the Gravettian<sup>13,14,61</sup>, consistently support intentional plant processing during the Late Pleistocene and make obvious the role played by vegetable foods as part of *HS'* nutritional strategy. Indeed, our study focuses on macro-tools (not obviously modified stone tools) such as grinding stones and pestles retrieved in Aurignacian layers of two key sites

455 for the Pontic Steppe colonization: Surein I on the Crimean Peninsula, and Brinzeni I, one of the sites that  
456 inspires the identification of the “Prut river culture” in Moldova, and referred to the earliest presence of  
457 modern humans in the area<sup>62</sup>. By investigating use-related starch granules extracted from Aurignacian  
458 ground stones the present contribution has (i) established a new investigative procedure that combines  
459 morphologic and chemical analyses; (ii) highlighted proxies to identify genuine ancient starch grains, and  
460 (iii) shed light on the origins of starchy food processing in Eurasia.

461 We applied a strict control since starch extraction (peel-off cleaning and sonication of specific used areas)  
462 and along the whole investigative pipeline (coupling MO, SEM, FTIR). As already demonstrated by Hart<sup>45</sup>  
463 putative contamination from soil and mismanagement of stone tools may be limited to the external  
464 surface, not affecting the reliability of granules and other U-RBRs entrapped at the bottom of crevices,  
465 holes, and other uneven portions of the coarse grinding stone surfaces. We recursively optimized sample  
466 preparation and measures to obtain more reliable samples and data. As presenting the results, several  
467 different pieces of evidence and findings were piled up to support the identification of genuine ancient  
468 starchy residues from Aurignacian ground stones, thus providing key clues for the dietary breadth of  
469 modern humans during their early colonization of Eurasia, around 40.000 years ago<sup>28</sup>.

470 One such line of evidence is the clear damage to the starch grains recovered in the samples from Brinzeni  
471 I and Surein I, visible using both optical and scanning electron microscopy. Damages to starch grains can  
472 be a result of biodegradation due to acidic or enzymatic actions due to fungi, bacteria, and enzymes<sup>46,47</sup>,  
473 and/or due to mechanical processes<sup>43</sup>. In our samples we observed many broken starch grains, and on  
474 many we noticed pits, cavities, the presence of conical craters, the solubilization of the internal portion of  
475 the grains, and grains exposing their lamellar structures (Figure 4 E-H) putatively interpreted as the result  
476 of enzymatic attack<sup>47</sup>. Damages such as radial fibrillar fractures on the surface may be attributed to  
477 crushing, perhaps as a result of mechanical forces employed when grinding plants (Figure 4 A-O).  
478 Moreover, the co-occurrence of starch grains together with other plant elements- phytoliths, raphides,  
479 fibers, and parenchyma- not only indicates these ground stones were used to process plant matter (Figure  
480 4 P-X), but also lessens the probability that the presence of starch grains are the result of modern  
481 contamination.

482 By adding the FTIR imaging it was possible to identify and characterize ASCs in complex matrices, even  
483 while accounting for the interference of mineral contaminants, and we added another piece to the puzzle  
484 allowing for the filtering of the false positives. Moreover, the SR-FTIR data on ASC-4 confirmed the  
485 identification of the ASC2 and ASC3 and strengthened the attribution to genuine starch material. The  
486 possibility to collect data from a single starch grain allowed to highlight subtle differences between each  
487 inspected particle to reveal traces of biomineralization in some of them, supported by the presence of  
488 strong carbonate peaks and clay bands. Moreover, FTIR data are in agreement of the SEM findings: some  
489 ASC-3 spectra show signals of calcium oxalate, in our data a shoulder at 1322 cm<sup>-1</sup>, ascribable to raphides,  
490 whereas, in other spectra, signals from lignin (1511 cm<sup>-1</sup> band) and other parenchyma components are  
491 present, such as ferulic and p-coumaric acids, compound phenols which are present in plant cell walls, and  
492 which become bioavailable through gut microbiome fermentation in the small intestine<sup>63</sup>. Ferulic acid  
493 owes its name to muskroot or giant fennel, *Ferula moschata*, and is common in species such as ginseng  
494 roots (Apiaceae family) and horse gram pulses (Fabaceae family).

495 By applying multivariate spectral analysis on modern starches spectra (reference collection built on the  
496 potential edibility and availability during the investigated period) it was also possible to propose the  
497 attribution of the ASCs we detected to genuine ancient starch grains, mainly originating from USOs,  
498 although their taxonomic attribution is still difficult to achieve<sup>12</sup>. By the PCA representation in Fig. 6A and  
499 the spectra shown in figures 5I, 5K and 6C, it is clear that most of the ASC spectra collected present only a  
500 similarity with those of MSR, used to build the model, e.g. spectrum c in figure 5I and MSR in figure 6C.

501 This is due to all the chemical and mechanical actions that these particles were subjected to during the  
502 passing of time, detectable in the FTIR spectra as extra peaks, band shifts and bands' component intensity  
503 variations. Nevertheless, it is exactly this not-so-perfect match with the MSR that conveys the final  
504 evidence to support the ancient origin of the retrieved particles.

505 Thus, the outcomes of our experiment contributed new proxies in building solid and measurable evidence  
506 for the detection and characterization of dietary carbohydrates (starch granules) processed by *HS* as soon  
507 as they arrived in the Pontic Steppe around 40.000 years ago BP. The comparison of the spectra extracted  
508 from modern starchy plants with those obtained from the ground stones use-related starch grains confirm  
509 the presence of USOs ancient starches. USOs are the structures with the purpose to store carbohydrates  
510 (starch grains) as well as oligosaccharides like inulin, and cell wall polysaccharides (Figure 4, e.g.  
511 parenchyma and fiber, Figure S1). Ancient starch grains were not the only plant residues adhering to the  
512 ground stones; we also documented other biogenic compounds such as fibers (Figures 4 and S1). Dietary  
513 fiber is important for the nutritional value of plant-based food because after undergoing fermentation by  
514 the gut microbiome, will supply valuable nutrients notably short chain fatty acids, precursors of essential  
515 biomolecules<sup>64</sup>. Furthermore, several twisted fibers were recognized on the ground stones from both sites  
516 (SOM), suggesting that plant processing covered a broader range of activities, possibly even the  
517 transformation of fiber into cordage<sup>11</sup> or weaved into baskets<sup>65</sup>. A further occurrence associated with  
518 Surein I starch grains is represented by raphides (calcium oxalate crystals), which have been reported as  
519 the result of processing of USOs' at Buran Kaya III (Crimea, layer C, associated with a *HS* burial,<sup>12,42</sup>).

520 With everything said, we believe that our multidimensional and contextual evidence strongly supports the  
521 hypothesis that the intentional processing of plant foods played a crucial role in the dietary habits of *HS*.  
522 Geophytes are predictable, usually clump to form significant amounts of biomass, and many of them are  
523 perennial, with above surface parts high enough to be visible even under snow (e.g. *Typha* sp., *Phragmites*  
524 sp., *Arundo donax*) hence, accessible during long winters<sup>24</sup>. They were part of a foraging strategy that made  
525 them energetic and nutritious food, far less risky than hunting large fatty herbivores and geophytes might  
526 have become a comfort food for *HS* under the challenging climatic constraints of the northern latitudes  
527 during Late MIS 3. Pounding a plant's storage organs disrupts the starch granules, clearly indicated by both  
528 the wear-traces and the broken grains extracted from the ground stones herein presented. Although not  
529 directly displayed by the data gathered in the presented analysis, we can speculate that after the reduction  
530 of USOs into a coarse raw flour, further boiling of this powder into a soup would be performed, as wet-  
531 cooking leads to the disruption of the degree of crystallinity of the grains and also releases insulin. Just a  
532 thermal treatment at around 90 °C increases the susceptibility for attack by alpha-amylase in the mouth  
533<sup>66</sup>, greatly enhancing starch bio accessibility and making it a highly nutritious food. Therefore, the  
534 mechanical and thermal treatment of starchy plants are crucial steps to make dietary carbohydrates  
535 ultimately bioavailable as glucose in the bloodstream. Starchy food is calorie-rich and nutritious, hence it  
536 might have been key to maintaining homeostasis and playing a vital role in supplying the energy leading to  
537 *HS'* evolutionary success when colonizing the northern latitudes of the Pontic Steppe Belt.

538 By moving towards a more precisely grounded recognition and attribution of those features characterizing  
539 starches, our research made it possible to recognize authentically old use-related starch granules. Our  
540 acquired solid data can be nicely framed into a new foraging model accounting for a stricter interplay of  
541 human-land exploitation which includes intentional processing of starchy plants, a practice that early  
542 modern humans carried along while venturing Out of Africa, highly enhancing their capacity to cope with  
543 the changing subsistence conditions. This is even more true when *HS* started moving north into a totally  
544 new territory, already inhabited by different human species and undergoing dramatic climatic downturns  
545 during the late MIS 3.

546



## 547 **Materials and Methods**

### 548 *Materials and depository*

549 The ground stones belong to museum collections: Surein I is curated at Peter The Great Museum of  
550 Anthropology and Ethnography in St. Petersburg (MAE-RAS) and the Brinzeni I cave stone tools are curated  
551 at the National Museum of History of Moldova.

552 As soon as we began carrying out the first experiments, in 2017, we acknowledged a major issue concerning  
553 the authenticity of the data. We worked on previously-washed stone tools (using water from the river  
554 located near the sites), diversely processed after their retrieval from the field, and then curated in national  
555 museums. Since G. Bonch-Osmolovski's excavation, which he magisterially documented using cutting-edge  
556 techniques, the stone from Surein I (Crimea) was very carefully re-staged at the MAE-RAS Museum, and to  
557 date is the best preserved Aurignacian context that suggests that the space was intentionally organized.  
558 During very careful excavation carried by N. Chetraru (1963-68), at Brinzeni I cave the percussive tools were  
559 recognised as ground stones and recorded in a XY coordinates system. After the excavation, the pebbles  
560 were curated in wooden boxes and no further attention (i.e. handling) was devoted to them, to the point  
561 that they are hardly mentioned in publications.

### 562 *Scanning Electron Microscopy*

563 Non-metallized samples were investigated at IOM-CNR with Zeiss Supra 40 high resolution Field Emission  
564 Gun (FEG) Scanning Electron Microscope (SEM) with Gemini column. The decision to not metallize the  
565 samples is due to the fact that the starches in this way might be further measured with FTIR technique or  
566 other analytical techniques. The acquisition of the images was performed at low acceleration voltage (2  
567 kV) due to the organic/biologic nature of the samples. This approach partially avoids both the charging of  
568 the surface, leading to a good quality of the final image, and the damaging of the sample itself.

### 569 *Sample preparation for Infrared analyses on the GSTs*

570 Gentle brushing was applied, using a new clean toothbrush each time, to remove the dust that had  
571 accumulated on the objects, either stored on shelves or in boxes. In order to reproduce the tools surface  
572 texture of the used areas at the nanometric scale and to clean the surface from possible contamination,  
573 up to three impressions were taken with a high resolution molding compound (Provil Novo light by Heraeus  
574 Kulzer), following the authors procedure<sup>23,67</sup>, with the dual goal of obtaining cleared area for successive  
575 sonication and a record of molds to apply the microscopic analysis of the wear-traces. The peeling effect  
576 is assumed to remove any putative contamination and was also used as a control sample. For the SEM and  
577 FTIR analyses, molds from the 2nd peeling were used. At this stage, the ground stones can be considered  
578 clean of any recent contamination and the particles remaining should be only those pushed inside the  
579 deeper ridges and crevices of the stone. U-RBR and starches adhering to the molds were observed under  
580 SEM but vinyl polysiloxane resulted not suitable for FTIR analysis (not reflective, nor flat). Hence, we  
581 decided to retrieve the particulate by dislodging the residues by sonication of a small piece of the molds in  
582 ultrapure water. This allowed to obtain a water suspension of the particles of interest that could be then  
583 deposited on a IR transparent substrate and measured.

584 Ultrasonic tanks were used to extract U-RBR out of the selected areas of the ground stones (ultrasonic  
585 power 180 W, 28 kHz is used for overall clean) at room temperature. As well, the molds (or selected parts  
586 of them) were sonicated (40 kHz for precise clean) to extract starch grains (ASC-3) and the procedure is  
587 detailed elsewhere<sup>23,37</sup>.

### 588 *ASCs extraction and isolation*

589 The implements from Surein I and Brinzeni I underwent different starch extraction procedures, all with the  
590 same aim to dislodge and to loosen the adhering nanoparticles from the cleaned areas. Surein I grinding  
591 stone and two refitting ground stones from Brinzeni (#442 and # NN; #833 and #2965 notably the grinding  
592 stone and the pestle) and 2 other implements (# 177 and # NN from square 11j) were all soaked in ultrapure  
593 water and sonicated in standard sonic-tanks with an average 20-40 kHz at room temperature for 15'  
594 minutes at the (IHMC-RAS St. Petersburg and Institute of Chemistry, Chisinau, Moldova). Compared to  
595 other published techniques (pipetting solvent, or washing uncontrolled broad areas <sup>14</sup>), precise area  
596 sonication presumably extracts material which is more likely to be ancient as the cavitation effect is more  
597 intense, and therefore removes sediment and entrapped organic particles from crevices and cracks of the  
598 ground stone. The sediment from sonicated artefacts was transferred into a 50 mL plastic test tube and  
599 concentrated by centrifuging. Other samples from Brinzeni I (a second sampling of #833, #442, and new  
600 sampling #3539, #6707, and #2965) were instead soaked in carbonated water overnight. The following day,  
601 the pellet was pipetted and transferred to a small vial. A drop of ethanol was added to each vial to stabilize  
602 the samples and no staining agents were added. The samples were then sent for starch grains extraction  
603 and analysis to two separate laboratories: IHAE-FB-RAS in Vladivostok and MSH Mondes in Nanterre, Paris.  
604 The laboratory methods followed those outlined by scholars <sup>41,68-70</sup> and used by one of the authors in other  
605 studies <sup>23,24,71</sup>. Prior to analysis, all the laboratory consumables were washed using Alconox or bleach. The  
606 two laboratories used two different heavy liquids to separate the starches: CsCl in IHAE-FB-RAS in  
607 Vladivostok and the sodium polytungstate in MSH Mondes in Nanterre, France. Typically, samples are  
608 mounted on slides with a water and glycerin (1:1) solution. For the purpose of this research, which  
609 integrates both optical, SEM observations and further chemo-profiling of the starch grains (i.e. FTIR), two  
610 different slides were prepared. A set of slides were mounted dry (without glycerin) to avoid adding  
611 additional elements to the FTIR spectrum and to be used for SEM scan, while the other set was mounted  
612 with glycerin for standard optical microscopy observation. The starch grains were observed under a cross-  
613 polarized microscope (Nikon Eclipse E600 Pol) and photographs and measurements taken using the  
614 software NIS-Elements (located at the Archéoscopie Platform at the MSH Mondes). The microscope used  
615 in Vladivostok is a Zeiss AXIO Scope A1 with magnification up to 800x, while in France magnification  
616 reached 600x. Photographs were taken in both cross-polarized and transmitted light (Fig. 3). A third set of  
617 archeological starches was prepared by MSH Mondes by dropping directly on ZnSe windows. The starch  
618 isolation processes were fine tuned in order to guarantee a low interference on FTIR measurements. When  
619 dried, both SPT and CsCl form a thick (a couple of microns) layer of salt that covers the whole droplet area.  
620 Although neither of the two chemicals have strong chemical features in the mid IR region, they partially  
621 hinder the identification of ASCs and enhance the scattering and dispersion effect of the smaller ones.  
622 Therefore, the protocols were adjusted with additional rinsing steps to remove the layering left behind.  
623 Moreover, we also experimented with adding several drops of the same sample on top of each other on  
624 the same ZnSe holder in order to increase the putative number of ASCs recovered, highly enhancing the  
625 chance to hit the beam on a larger number of starch grains.

#### 626 *Modern starch reference collection*

627 With the aim of building a tailored reference collection, a sequential water/ethanol extraction from the  
628 USOs and ASOs selected according to pollen and plant lists available for the Pontic steppe <sup>42,72,73</sup> were  
629 carried out as follows at DAIS, Ca' Foscari University of Venice. 5 grams (or multiple aliquots) of each of the  
630 raw storage organs were grinded by means of a blender (marca del minipimer) and the chopped residue  
631 was soaked in 200 mL of ultrapure water (with a resistivity of 18.2 MΩcm, obtained with the Milli-Q®  
632 system Millipore) for 3 hours. The mixture was then filtered off in a Millipore filtration apparatus (Merck  
633 Millipore Glass Vacuum filtration system) by using a metallic filter with pore size of 0.1 mm. The filtered  
634 water containing the starches was then centrifuged at 7000 RPM (RCF = 6147) for 10 minutes at 20 °C, the  
635 pellet obtained by removing the supernatant were washed with 100 mL of ultrapure water and the mixture

636 was sonicated for 10 minutes before recovering the pellet by further centrifugation. The precipitated  
637 matrix was then washed with EtOH (Sigma Aldrich), followed by the sonication and centrifugation  
638 processes as described above. The pellets recovered after this extraction procedure were dried and added  
639 to the permanent reference collection. An aliquot of 1 mg was dispersed in ultrapure water and droplets  
640 of 0,5  $\mu$ L were set on the ZnSe holder for SR-FTIR analyses and SEM inspection.

#### 641 *Infrared measurements*

642 Samples were measured at SISSI (Synchrotron Infrared Source for Spectroscopy and Imaging) at Elettra –  
643 Sincrotrone Trieste<sup>74</sup>. The molds from the second peeling of the grinding stones and pestles were sonicated  
644 in ultrapure Milli-Q® water to retrieve the starch material (ASC-3), along with any other powder material  
645 present on the mold's surface. The water suspension so obtained was centrifuged and concentrated in a  
646 1.5 mL Eppendorf vial. 100  $\mu$ L drops of the pellet were deposited onto ZnSe optical windows and dried in  
647 a sterile laminar flow hood. The samples so prepared were measured using a Bruker Hyperion 3000 IR/VIS  
648 microscope coupled with a Bruker Vertex 70V interferometer. The microscope is equipped with a 64x64  
649 pixel Focal Plane Array (FPA) detector capable of acquiring a full FTIR spectrum per pixel, thus generating  
650 4096 pixels' hyperspectral images for each measure. Given the 15x magnification of the microscope, the  
651 pixel size is 2.6 x 2.6 microns and the field of view of one image (tile) is 167x167 microns. Mosaics  
652 containing multiple tiles were acquired for each sample. The measurement parameters used for each FPA  
653 measurement were the following: 64 scans at 8  $\text{cm}^{-1}$  spectral resolution, 5 kHz scanner speed. A total of  
654 more than 50 hyperspectral maps were collected. Once areas of interest were identified by FPA imaging,  
655 isolated starches were measured using Infrared Synchrotron radiation (IRSR) and a Mercury Cadmium  
656 Telluride (MCT) detector. The parameters used for each MCT measurement were the following: 512 scans  
657 at 4  $\text{cm}^{-1}$  spectral resolution, 120 kHz scanner speed, setting the apertures at the same size of the starches,  
658 from 20 to 40 microns. Data was analysed in OPUS (Bruker Optics) and Quasar (<https://quasar.codes>)<sup>75,76</sup>.  
659 Due to contamination from surrounding material some ACS's spectra had to be further processed by  
660 subtracting the spectra of the soil background, which was obtained by extracting an average spectrum of  
661 the adjacent pixels. By analysing several samples obtained from different molds (~50 FTIR images), it was  
662 decided that in order for it to be considered a starch-candidate, the particle and its average spectrum,  
663 should have the following characteristics:

- 664 • Be a hotspot in the chemical distribution image for both –OH stretching and CH<sub>2</sub>-CH<sub>3</sub> carbon  
665 hydrogen stretching moieties, since for C-O-C the signal could be affected by minerals; and
- 666 • Have a roundish shape with a diameter between 10 and 40 microns, even though aggregates could  
667 not be excluded

668 The above described conditions have the purpose to limit the areas to be analyzed. Then, once the possible  
669 spots are identified, the extracted average spectrum has to be "starch-like"<sup>50</sup>.

670



## References and Notes

1. Copeland, L. & Hardy, K. Archaeological Starch. *Agronomy* **8**, 1–12 (2018).
2. Haas, J. *et al.* Evidence for maize (&em>Zea mays&/em>) in the Late Archaic (3000–1800 B.C.) in the Norte Chico region of Peru. *Proc. Natl. Acad. Sci.* **110**, 4945 LP – 4949 (2013).
3. Vinton, S. D., Perry, L., Reinhard, K. J., Santoro, C. M. & Teixeira-Santos, I. Impact of Empire Expansion on Household Diet: The Inka in Northern Chile’s Atacama Desert. *PLoS One* **4**, e8069 (2009).
4. Zakrzewski, S., Shortland, A. & Rowland, J. *Science in the Study of Ancient Egypt*. (Routledge, 2015). doi:10.4324/9781315678696
5. Larbey, C., Mentzer, S. M., Ligouis, B., Wurz, S. & Jones, M. K. Cooked starchy food in hearths ca. 120 kya and 65 kya (MIS 5e and MIS 4) from Klasies River Cave, South Africa. *J. Hum. Evol.* **131**, 210–227 (2019).
6. Wadley, L., Backwell, L., D’Errico, F. & Sievers, C. Cooked starchy rhizomes in Africa 170 thousand years ago. *Science (80-. )*. **367**, 87–91 (2020).
7. Florin, S. A. *et al.* The first Australian plant foods at Madjedbebe, 65,000–53,000 years ago. *Nat. Commun.* **11**, 924 (2020).
8. Karkanas, P. (Takis) & Goldberg, P. *Reconstructing Archaeological Sites*. (Wiley, 2018). doi:10.1002/9781119016427
9. Snir, A. *et al.* The Origin of Cultivation and Proto-Weeds, Long Before Neolithic Farming. *PLoS One* **10**, e0131422 (2015).
10. Dubreuil, L. & Nadel, D. The development of plant food processing in the Levant: insights from use-wear analysis of Early Epipalaeolithic ground stone tools. *Philos. Trans. R. Soc. B Biol. Sci.* **370**, 20140357 (2015).
11. Hardy, B. L. *et al.* Direct evidence of Neanderthal fibre technology and its cognitive and behavioral implications. *Sci. Rep.* **10**, 4889 (2020).
12. Hardy, B. L., Kay, M., Marks, A. E. & Monigal, K. Stone tool function at the paleolithic sites of Starosele and Buran Kaya III, Crimea: Behavioral implications. *Proc. Natl. Acad. Sci. U. S. A.* **98**, 10972–10977 (2001).
13. Revedin, A. *et al.* Thirty thousand-year-old evidence of plant food processing. *Proc. Natl. Acad. Sci. U. S. A.* **107**, 18815–18819 (2010).
14. Revedin, A. *et al.* New technologies for plant food processing in the Gravettian. *Quat. Int.* **359–360**, 77–88 (2015).
15. *Wild Harvest*. (Oxbow Books, 2016).
16. Sobkowiak-Tabaka, I. *et al.* Multi-proxy records of Mesolithic activity in the Lubuskie Lakeland (western Poland). *Veg. Hist. Archaeobot.* **29**, 153–171 (2020).
17. Golovanova, L. V. *et al.* Significance of Ecological Factors in the Middle to Upper Paleolithic Transition. *Curr. Anthropol.* **51**, 655–691 (2010).
18. Pyle, D. M. *et al.* Wide dispersal and deposition of distal tephra during the Pleistocene ‘Campanian

- Ignimbrite/Y5' eruption, Italy. *Quat. Sci. Rev.* **25**, 2713–2728 (2006).
19. Chetraru, N. A. Pamiatniki epokh paleolita i mezolita (Sites of the Palaeolithic and Mesolithic Ages). (1973).
  20. Chabai, V. P., Monigal, K. & Marks, A. E. *The Middle Paleolithic and Early Upper Paleolithic of Eastern Crimea III*. (Eraul, 2004).
  21. Vekilova, E. . Surein I and its place among the Paleolithic sites of Crimea and the next territories. *Mater. Res. Archaeol. USSR (Materialy i Issled. po Arkheologii SSSR)* **59**, 235–323 (1957).
  22. Longo, L. *et al.* Les gestes retrouvés: a 3D Visualization Approach to the Functional Study of Early Upper Palaeolithic Ground Stones. in *CAA2016: Oceans of Data Proceedings of the 44th Conference on Computer Applications and Quantitative Methods in Archaeology* (eds. Matsumoto, M. & Uleberg, E.) 447–455 (Oxford: Archaeopress, 2018).
  23. Longo, L., Skakun, N., Pantyukhina, I., Terekhina, V. & Sorrentino, G. Aurignacian Ground Stone from Surein I (Crimea): “trace-ing” the roots of starch-based diet. *J. Archaeol. Sci. Reports Spec. Issue submitted*, (2020).
  24. Longo, L. *et al.* At the origins of starch diet. A multidimensional approach to investigate use-related biogenic residues on stone tools. *Environ. Archaeol.* **in press**, (2020).
  25. Skakun, N. *et al.* Каменные терочники и песты из селетоидного слоя грота Брынзены I (Республика Молдова) (в свете экспериментально-трасологического исследования, данных анализа органических остатков и 3d сканирования). *Eminak* 74–86 (2020). doi:10.33782/eminak2020.1(29).380
  26. Collins, M. J. & Copeland, L. Ancient starch: Cooked or just old? *Proc. Natl. Acad. Sci.* **108**, E145–E145 (2011).
  27. Mercader, J. *et al.* Exaggerated expectations in ancient starch research and the need for new taphonomic and authenticity criteria. *Facets* **3**, 777–798 (2018).
  28. Fewlass, H. *et al.* A 14C chronology for the Middle to Upper Palaeolithic transition at Bacho Kiro Cave, Bulgaria. *Nat. Ecol. Evol.* **4**, 794–801 (2020).
  29. Sirenko, S. A., Mel'nychuk, I. V. & Turlo, S. I. *Progress in study and reconstruction of Anthropogenic paleo landscapes of the Ukraine. Development of Geography in Ukrainian SSR* (“Naukova dumka” Publ., 1990).
  30. Bataille, G., Tafelmaier, Y. & Weniger, G. C. Living on the edge – A comparative approach for studying the beginning of the Aurignacian. *Quat. Int.* **474**, 3–29 (2018).
  31. Demidenko, Y. E. Siuren I Rockshelter: From the Late Middle Paleolithic and Early Upper Paleolithic to the Epipaleolithic in Crimea. in *Encyclopedia of Global Archaeology* (ed. Smith, C.) 6711–6721 (Springer New York, 2014). doi:10.1007/978-1-4419-0465-2\_1867
  32. Fu, Q. *et al.* An early modern human from Romania with a recent Neanderthal ancestor. *Nature* **524**, 216–219 (2015).
  33. Perry, G. H. *et al.* Diet and the evolution of human amylase gene copy number variation. *Nat. Genet.* **39**, 1256–1260 (2007).
  34. Perry, G. H., Kistler, L., Kelaita, M. A. & Sams, A. J. Insights into hominin phenotypic and dietary evolution from ancient DNA sequence data. *J. Hum. Evol.* **79**, 55–63 (2015).

35. Prat, S. *et al.* The Oldest Anatomically Modern Humans from Far Southeast Europe: Direct Dating, Culture and Behavior. *PLoS One* **6**, e20834 (2011).
36. Péan, S. *et al.* The Middle to Upper Paleolithic Sequence of Buran-Kaya III (Crimea, Ukraine): New Stratigraphic, Paleoenvironmental, and Chronological Results. *Radiocarbon* **55**, 1454–1469 (2013).
37. Longo, L. *et al.* Coupling the beams: SR-FTIR, OM, DM and SEM microscopy applied to the Aurignacian ground stones from the Pontic Steppe. *J. Archaeol. Sci. Reports, Proc. ICAS-EMME Cyprus Spec. Issue submitted*, (2020).
38. Kuhn, L. P. Infrared Spectra of Carbohydrates. *Anal. Chem.* **22**, 276–283 (1950).
39. Buléon, A., Gérard, C., Riekkel, C., Vuong, R. & Chanzy, H. Details of the crystalline ultrastructure of C-starch granules, revealed by synchrotron microfocus mapping. *Macromolecules* **31**, 6605–6610 (1998).
40. International Atomic Energy Agency. Controlling of degradation effects in radiation processing of polymers (IAEA-TECDOC-1617). *Ind. Appl. Chem. Sect. IAEA 225* (2009).
41. Pearsall, D. M., Chandler-Ezell, K. & Zeidler, J. A. Maize in ancient Ecuador: results of residue analysis of stone tools from the Real Alto site. *J. Archaeol. Sci.* **31**, 423–442 (2004).
42. Hardy, B. L. Climatic variability and plant food distribution in Pleistocene Europe: Implications for Neanderthal diet and subsistence. *Quat. Sci. Rev.* **29**, 662–679 (2010).
43. Barrera, G. N. *et al.* Evaluation of the mechanical damage on wheat starch granules by SEM, ESEM, AFM and texture image analysis. *Carbohydr. Polym.* **98**, 1449–1457 (2013).
44. Barton, H. Starch granule taphonomy: the results of a two year field experiment.
45. Hart, T. C. Evaluating the usefulness of phytoliths and starch grains found on survey artifacts. *J. Archaeol. Sci.* **38**, 3244–3253 (2011).
46. Haslam, M. The decomposition of starch grains in soils: implications for archaeological residue analyses. *J. Archaeol. Sci.* **31**, 1715–1734 (2004).
47. French, D. ORGANIZATION OF STARCH GRANULES. in *Starch: Chemistry and Technology* (eds. Whistler, R. L., BeMiller, R. J. & Paschall, E. P.) 183–247 (Academic Press, 1984). doi:10.1016/B978-0-12-746270-7.50013-6
48. Franceschi, V. R. & Nakata, P. A. CALCIUM OXALATE IN PLANTS: Formation and Function. *Annu. Rev. Plant Biol.* **56**, 41–71 (2005).
49. Crowther, A. Morphometric analysis of calcium oxalate raphides and assessment of their taxonomic value for archaeological microfossil studies. in *Archaeological Science Under a Microscope: Studies in Residue and Ancient DNA Analysis in Honour of Thomas H. Loy* (eds. Crowther, A., Haslam, M., Robertson, G., Nugent, S. & Kirkwood, L.) **30**, 102–128 (ANU Press, 2009).
50. Kizil, R., Irudayaraj, J. & Seetharaman, K. Characterization of irradiated starches by using FT-Raman and FTIR spectroscopy. *J. Agric. Food Chem.* **50**, 3912–3918 (2002).
51. Warren, F. J., Gidley, M. J. & Flanagan, B. M. Infrared spectroscopy as a tool to characterise starch ordered structure—a joint FTIR–ATR, NMR, XRD and DSC study. *Carbohydr. Polym.* **139**, 35–42 (2016).
52. Socrates, G. *Infrared and Raman characteristic group frequencies. Infrared and Raman characteristic group frequencies* (Wiley, 2004). doi:10.1002/jrs.1238

53. Kačuráková, M. & Wilson, R. H. Developments in mid-infrared FT-IR spectroscopy of selected carbohydrates. *Carbohydr. Polym.* **44**, 291–303 (2001).
54. Wiercigroch, E. *et al.* Raman and infrared spectroscopy of carbohydrates: A review. *Spectrochim. Acta Part A Mol. Biomol. Spectrosc.* **185**, 317–335 (2017).
55. Melamed, Y., Kislev, M. E., Geffen, E., Lev-Yadun, S. & Goren-Inbar, N. The plant component of an Acheulian diet at Gesher Benot Ya'aqov, Israel. *Proc. Natl. Acad. Sci.* **113**, 14674–14679 (2016).
56. Hardy, K. Plant use in the Lower and Middle Palaeolithic: Food, medicine and raw materials. *Quat. Sci. Rev.* **191**, 393–405 (2018).
57. Hardy, K., Brand-Miller, J., Brown, K. D., Thomas, M. G. & Copeland, L. The Importance of Dietary Carbohydrate in Human Evolution. *Q. Rev. Biol.* **90**, 251–268 (2015).
58. Weyrich, L. S. *et al.* Neanderthal behaviour, diet, and disease inferred from ancient DNA in dental calculus. *Nature* **544**, 357–361 (2017).
59. Darwin, C. Voyage of the Beagle: Bahia Blanca to Buenos Ayres. in *From So Simple a Beginning: The Four Great Books of Charles Darwin* (ed. Wilson, E.) 121 (W. W. Norton & Company, 2006).
60. Buck, L. T. & Stringer, C. B. Having the stomach for it: a contribution to Neanderthal diets? *Quat. Sci. Rev.* **96**, 161–167 (2014).
61. Longo, L. Gestures from the past: Grinding stones and starchy food processing at the dawn of modern humans. in *Proceedings of the 2016 International Conference on Virtual Systems and Multimedia, VSMM 2016* 294–300 (IEEE, 2016). doi:10.1109/VSMM.2016.7863149
62. Allsworth-Jones, P., Borziac, I. A., Chetraru, N. A., French, C. A. I. I. & Medyanik, S. I. Brînzei: A Multidisciplinary Study of an Upper Palaeolithic site in Moldova. *Proc. Prehist. Soc.* **84**, 41–76 (2018).
63. Mateo Anson, N., van den Berg, R., Havenaar, R., Bast, A. & Haenen, G. R. M. M. Bioavailability of ferulic acid is determined by its bioaccessibility. *J. Cereal Sci.* **49**, 296–300 (2009).
64. Lovegrove, A. *et al.* Role of polysaccharides in food, digestion, and health. *Crit. Rev. Food Sci. Nutr.* **57**, 237–253 (2017).
65. Aranguren, B., Longo, L., Pallecchi, P. & Revedin, A. The operative chain of the Noailles Burin: typology, technology and functionality. in *Actes de la Table Ronde "Burins : formes, fonctionnements, fonctions"* (eds. Araujo Igreja, M. de, Bracco, J.-P. & Le Brun-Ricalens, F.) 143–162 (Musée national d'histoire et d'art. Luxembourg, 2007).
66. Butterworth, P. J., Warren, F. J. & Ellis, P. R. Human  $\alpha$ -amylase and starch digestion: An interesting marriage. *Starch - Stärke* **63**, 395–405 (2011).
67. Pedergrana, A., Asryan, L., Fernández-Marchena, J. L. & Ollé, A. Modern contaminants affecting microscopic residue analysis on stone tools: A word of caution. *Micron* **86**, 1–21 (2016).
68. Torrence, R. *Ancient Starch Research*. (Routledge, 2016). doi:10.4324/9781315434896
69. Lentfer, C. J., Therin, M. A protocol for extraction of starch from sediments. in *Ancient Starch Research* (eds. Torrence, R. & Barton, H.) 159–161 (2006).
70. Yang, X. *et al.* Early millet use in northern China. *Proc. Natl. Acad. Sci.* **109**, 3726–3730 (2012).
71. Cagnato, C. & Ponce, J. M. Ancient Maya manioc (*Manihot esculenta* Crantz) consumption: Starch grain



evidence from late to terminal classic (8th–9th century CE) occupation at La Corona, northwestern Petén, Guatemala. *J. Archaeol. Sci. Reports* **16**, 276–286 (2017).

72. Gubanov, I. A., Kiseleva, K. V., Novikov, V. S. & Tychemirov, V. N. *Illustrated determinant of plants of Middle Russia - Vol. 1.* (KMK Press, Institute of Technological Research Press, 2002).
73. Kovárník, J. & Beneš, J. Microscopic analysis of starch grains and its applications in the archaeology of the stone age. *Interdiscip. Archaeol.* **9**, 83–93 (2018).
74. Lupi, S. *et al.* Performance of SISSI, the infrared beamline of the ELETTRA storage ring. *J. Opt. Soc. Am. B* **24**, 959 (2007).
75. Demšar, J. *et al.* Orange: Data Mining Toolbox in Python. *J. Mach. Learn. Res.* **14**, 23492353 (2013).
76. Toplak, M. *et al.* Infrared Orange: Connecting Hyperspectral Data with Machine Learning. *Synchrotron Radiat. News* **30**, 40–45 (2017).

## Acknowledgments

**General:** We are thankful to the Director of MAE RAS, St. Petersburg (Y.K. Chistov), the Institute of Archaeology (V. Dergachev and V. Bicbaev) and M. E. Tkachuk who allowed the sampling and sustained our research, under formal MoUs and Research Agreements, and R. Ciancio (IOM-CNR) for the access and technical support to the SEM facility at IOM-CNR, Trieste, Italy. We acknowledge Elettra Sincrotrone Trieste for providing access to synchrotron radiation facility (beamtime numbers 20170057 and 20190310). We are sincerely grateful to B. Demarchi and Hoi-Ying Holman (Lawrence Berkeley National Laboratory) for critical enhancement of the earlier draft.

**Funding:** This work was supported by NTU (Singapore) SUG grant M4081669.090 (L.L.), DiSTABIF (UniCampania, Visiting Professor 2018 to L.L., hosted by C.L.) and Patto per Venezia (A.M. and E.B.). The studies were performed within the project 20.80009.7007.02 at the Institute of Zoology, Republic of Moldova.

**Author contributions:** L.L. conceived the study collaborating with N.N.S., and together with L.V. and G.B. designed the experiments. G.B., E.B., A.M., C.L., L.V. and L.L. further developed research implementation and methodological refinement; I.P. and C.C. performed the OM starch analysis; N.C. and C.S. performed SEM analysis; GS and LL developed the Digital microscopy investigation. G.B. and L.L. designed and wrote the article with input from C.C. All authors reviewed, commented and approved the final version of the manuscript and agree to be held accountable for the content therein.

**Competing interests:** There are no competing interests.
